# Supplementary material
Source: PubMed Central journal article supplement (PMC5783671)
Supplement: EHP826.s001.acco.pdf [file EHP826.s001.acco.pdf]

**Note to readers with disabilities:** *EHP* strives to ensure that all journal content is accessible to all readers. However, some figures and Supplemental Material published in *EHP* articles may not conform to [508 standards](#) due to the complexity of the information being presented. If you need assistance accessing journal content, please contact [ehp508@niehs.nih.gov](mailto:ehp508@niehs.nih.gov). Our staff will work with you to assess and meet your accessibility needs within 3 working days.

### **Supplemental Material**

#### **A human mixture risk assessment for neurodevelopmental toxicity associated with polybrominated diphenyl ethers used as flame retardants**

Olwenn V Martin, Richard M Evans, Michael Faust and Andreas Kortenkamp

#### **Table of Contents**

**Table S1.** PBDE congeners in breast milk samples (ng/g lipid weight)

**Table S2.** PBDE intakes via food for children (1-3 years), ng/kg bw/d

**Table S3.** PBDE intakes via food for adults, ng/kg bw/d

**Table S4.** PBDE congeners in indoor dust samples (ng/g)

**Table S5.** PBDE congeners in serum and blood samples (ng/g lipid weight)

**Table S6.** Mixture risk assessment for breast-feeding infants (0-3 months), supplemental information to Table 2, main text

**Table S7.** Mixture risk assessment for small children (1-3 years), supplemental information to Table 2, main text

**Table S8.** Mixture risk assessment for adults, supplemental information to Table 2, main text

**Table S9.** Mixture risk assessment for foetuses (supplemental information to Table 3 of main text)

**Table S10.** Level 2 mixture risk assessment for small children based on body burdens estimated from PBDE serum levels (supplemental information to Table 3 of main text)

**Table S11.** Level 3 mixture risk assessment for small children based on body burdens estimated from PBDE serum levels (supplemental information to Table 3 of main text)

**Table S12.** Level 2 mixture risk assessment for adults based on body burdens estimated from PBDE serum levels (supplemental information to Table 3 of main text) – France

**Table S13.** Level 3 mixture risk assessment for adults based on body burdens estimated from PBDE serum levels (supplemental information to Table 3 of main text) – France

**Table S14.** Level 2 mixture risk assessment for adults based on body burdens estimated from PBDE serum levels (supplemental information to Table 3 of main text) – USA

**Table S15.** Level 3 mixture risk assessment for adults based on body burdens estimated from PBDE serum levels (supplemental information to Table 3 of main text) – USA

## **References**

**Table S1: PBDE congeners in breast milk samples (ng/g lipid weight)**

| Country              | N  | Statistic | BDE-28      | BDE-47      | BDE-99      | BDE-100     | BDE-153     | BDE-154     | BDE-183     | BDE-196     | BDE-197     | BDE-201     | BDE-202     | BDE-203     | BDE-206     | BDE-207     | BDE-208     | BDE-209     | Reference                |                           |
|----------------------|----|-----------|-------------|-------------|-------------|-------------|-------------|-------------|-------------|-------------|-------------|-------------|-------------|-------------|-------------|-------------|-------------|-------------|--------------------------|---------------------------|
| <b>Europe</b>        |    |           |             |             |             |             |             |             |             |             |             |             |             |             |             |             |             |             |                          |                           |
| France               | 77 | mean      | <u>0.18</u> | 2.16        | <u>1.10</u> | 0.41        | 1.01        | 0.10        | 0.17        | 0.09        | <u>0.47</u> | <b>0.12</b> | <b>0.10</b> | 0.12        | <b>0.55</b> | <u>0.86</u> | <u>0.25</u> | 1.88        | Antignac et al. (2009)   |                           |
|                      |    | min       | 0.04        | 0.34        | 0.13        | 0.05        | 0.29        | 0.01        | 0.03        | 0.01        | 0.07        | 0.02        | 0.01        | 0.01        | 0.11        | 0.10        | 0.02        | 0.39        |                          |                           |
|                      |    | max       | 1.62        | 12.04       | 5.26        | 3.91        | 10.45       | 0.69        | 1.88        | 0.32        | 2.10        | 1.18        | 1.44        | 1.50        | 2.27        | 2.59        | 1.35        | 6.80        |                          |                           |
| Sweden               | 9  | median    | 0.031       | <u>3.01</u> | 0.50        | 0.56        | <b>1.67</b> | <b>0.28</b> |             |             | 0.08        |             |             | <i>0.05</i> |             | <i>0.11</i> |             | 0.22        | Jakobsson et al. (2012)  |                           |
|                      |    | min       | 0.018       | 1.0         | 0.24        | 0.23        | <u>0.77</u> | <u>0.14</u> |             |             | <i>0.05</i> |             |             | <i>0.05</i> |             | <i>0.11</i> |             | 0.22        |                          |                           |
|                      |    | max       | 0.073       | 10.7        | 2.31        | 2.43        | 3.02        | 1.48        |             |             | 0.30        |             |             | 0.16        |             | <i>0.11</i> |             | 0.89        |                          |                           |
| Spain (Vallecas)     | 22 | median    | 0.01        | 0.37        | 0.51        | <u>0.58</u> | 0.13        | 0.02        | <u>0.30</u> | <u>0.12</u> | 0.46        |             |             |             |             |             |             | <u>2.90</u> | Gomara et al. (2007)     |                           |
|                      |    | min       | 0.01        | 0.03        | 0.30        | 0.18        | 0.03        | 0.01        | 0.12        | 0.00        | 0.02        |             |             |             |             |             |             | 0.16        |                          |                           |
|                      |    | max       | 0.10        | 3.60        | 3.30        | 1.90        | 3.20        | 2.00        | 3.90        | 4.40        | 5.50        |             |             |             |             |             |             |             |                          | 52.00                     |
| Spain (Getale)       | 9  | median    | <i>0.01</i> | 0.22        | 0.38        | 0.46        | 0.10        | <i>0.01</i> | 0.28        | 0.05        | 0.47        |             |             |             |             |             |             |             | 2.80                     |                           |
|                      |    | min       |             | 0.00        | 0.15        | 0.15        | 0.02        |             | 0.01        | 0.00        | 0.06        |             |             |             |             |             |             |             | 0.16                     |                           |
|                      |    | max       |             | 1.20        | 1.00        | 1.00        | 1.20        |             | 6.50        | 1.40        | 2.80        |             |             |             |             |             |             |             | 33.00                    |                           |
| <b>Africa</b>        |    |           |             |             |             |             |             |             |             |             |             |             |             |             |             |             |             |             |                          |                           |
| Ghana                | 42 | mean      | 0.07        | 1.62        | 0.49        | 0.29        | 0.24        | 0.03        | 0.11        | 0.04        | 0.20        |             |             |             | 0.04        | 0.09        |             |             | 1.00                     | Asante et al. (2011)      |
|                      |    | min       | 0.01        | 0.31        | 0.01        | 0.01        | 0.01        | 0.01        | 0.01        | 0.01        | 0.01        | 0.01        |             |             |             | 0.01        | 0.01        |             | 0.01                     |                           |
|                      |    | max       | 0.39        | 5.90        | 4.00        | 1.30        | 1.10        | 0.20        | 0.90        | 0.15        | 0.50        |             |             |             |             | 0.29        | 0.30        |             | 11.00                    |                           |
| <b>Asia</b>          |    |           |             |             |             |             |             |             |             |             |             |             |             |             |             |             |             |             |                          |                           |
| India                | 10 | mean      | 0.06        | 0.45        | 0.05        | 0.11        | 0.24        | 0.09        | 0.07        | 0.02        | 0.08        |             |             |             | 0.07        | 0.18        |             |             | 0.83                     | Devananthan et al. (2012) |
|                      |    | min       | 0.05        | 0.06        | 0.00        | 0.00        | 0.23        | 0.00        | 0.00        | 0.00        | 0.00        | 0.04        |             |             |             | 0.02        | 0.00        |             | 0.26                     |                           |
|                      |    | max       | 0.09        | 0.87        | 0.10        | 0.76        | 0.98        | 0.65        | 0.45        | 0.08        | 0.15        |             |             |             |             | 0.18        | 0.63        |             | 2.00                     |                           |
| Taiwan               | 32 | mean      | 0.09        | 0.58        | 0.19        | 0.19        | 0.96        | 0.09        | 0.16        | 0.03        | 0.21        |             |             | 0.08        | 0.06        | 0.15        | 0.06        | 0.48        | Koh et al. (2010)        |                           |
|                      |    | min       | 0.04        | 0.37        | 0.12        | 0.13        | 0.68        | 0.04        | 0.01        | 0.02        | 0.13        |             |             | 0.04        | 0.02        | 0.08        | 0.03        | 0.22        |                          |                           |
|                      |    | max       | 0.29        | 1.32        | 0.48        | 0.37        | 1.93        | 0.21        | 0.66        | 0.07        | 0.58        |             |             | 0.25        | 0.21        | 0.45        | 0.19        | 1.93        |                          |                           |
| Taiwan               | 70 | mean      | 0.14        | 1.90        | 0.46        | 0.46        | 1.11        | 0.12        | 0.24        | 0.04        | 0.30        |             |             | 0.08        | 0.07        | 0.20        | 0.07        | 0.47        | Chao et al. (2011)       |                           |
|                      |    | min       | 0.02        | 0.21        | 0.04        | 0.07        | 0.36        | 0.02        | 0.00        | 0.00        | 0.07        |             |             | 0.00        | 0.00        | 0.02        | 0.00        | 0.00        |                          |                           |
|                      |    | max       | 4.41        | 80.40       | 19.70       | 10.40       | 10.20       | 0.90        | 6.00        | 0.28        | 2.20        |             |             | 0.60        | 0.31        | 1.05        | 0.31        | 1.70        |                          |                           |
| China (Shangai)      | 48 | mean      | 0.46        | 0.45        | 0.12        | 0.14        | 0.79        | 0.08        | 0.26        | 0.26        | <b>1.46</b> |             |             | <b>0.46</b> | 0.30        | <b>1.13</b> | <b>0.43</b> | 2.20        | Ma et al. (2012)         |                           |
|                      |    | min       | 0.11        | 0.14        | 0.04        | 0.05        | 0.26        | 0.00        | 0.04        | 0.04        | 0.23        |             |             | 0.07        | 0.00        | 0.20        | 0.07        | 0.20        |                          |                           |
|                      |    | max       | 3.89        | 2.39        | 0.25        | 0.53        | 3.89        | 0.20        | 1.09        | 1.69        | 6.82        |             |             | 2.79        | 0.98        | 4.05        | 1.90        | 8.60        |                          |                           |
| China (Shijiazhuang) | 48 | mean      | 0.22        | 0.23        | 0.05        | 0.05        | 0.38        | 0.00        | 0.10        | 0.14        | 0.28        |             |             |             |             | 0.35        |             | 0.70        | Sun et al. (2010)        |                           |
|                      |    | min       | 0.09        | 0.11        | 0.02        | 0.03        | 0.23        | 0.00        | 0.05        | 0.06        | 0.10        |             |             |             |             | 0.13        |             | 0.16        |                          |                           |
|                      |    | max       | 0.74        | 0.63        | 0.11        | 0.14        | 1.10        | 0.00        | 0.31        | 0.45        | 3.70        |             |             |             |             | 4.50        |             | 14.00       |                          |                           |
| China (Tianjin)      | 50 | mean      | 0.38        | 0.35        | 0.06        | 0.06        | 0.38        | 0.04        | 0.07        | 0.08        | 0.34        |             |             |             |             | 0.17        |             | 0.30        |                          |                           |
|                      |    | min       | <b>0.44</b> | 0.34        | 0.04        | 0.03        | 0.10        | 0.01        | 0.03        | 0.02        | 0.10        |             |             |             |             | 0.05        |             | 0.30        |                          |                           |
|                      |    | max       | 3.20        | 2.00        | 0.32        | 0.25        | 0.78        | 0.07        | 0.16        | 0.13        | 0.72        |             |             |             |             | 0.33        |             | 2.50        |                          |                           |
| China (Yantai)       | 60 | mean      | <b>0.49</b> | 0.74        | 0.09        | 0.14        | 0.66        | 0.05        | 0.12        | 0.09        | 0.52        |             |             |             |             | 0.20        |             | 0.22        |                          |                           |
|                      |    | min       | 0.26        | 0.41        | 0.05        | 0.06        | 0.42        | 0.03        | 0.06        | 0.05        | 0.23        |             |             |             |             | 0.10        |             | 0.12        |                          |                           |
|                      |    | max       | 1.10        | 2.00        | 0.25        | 0.32        | 1.20        | 0.10        | 0.29        | 0.17        | 1.30        |             |             |             |             | 0.45        |             | 0.50        |                          |                           |
| China                | 19 | mean      | 0.28        | 0.49        | 0.12        | 0.15        | 0.78        | 0.07        | 0.22        | <b>0.46</b> | 0.95        |             |             |             | 0.21        | 0.83        |             | <b>3.00</b> | Sudaryanto et al. (2008) |                           |
|                      |    | min       | 0.04        | 0.11        | 0.03        | 0.06        | 0.00        | 0.00        | 0.00        | 0.00        | 0.26        |             |             |             | 0.00        | 0.17        |             | 1.30        |                          |                           |
|                      |    | max       | 0.65        | 1.40        | 0.52        | 0.13        | 1.50        | 0.14        | 0.53        | 1.60        | 2.50        |             |             |             | 0.61        | 2.50        |             | 5.20        |                          |                           |

| Country                              | N  | Statistic | BDE-28 | BDE-47      | BDE-99      | BDE-100     | BDE-153 | BDE-154 | BDE-183     | BDE-196 | BDE-197 | BDE-201 | BDE-202 | BDE-203 | BDE-206 | BDE-207 | BDE-208 | BDE-209 | Reference                 |
|--------------------------------------|----|-----------|--------|-------------|-------------|-------------|---------|---------|-------------|---------|---------|---------|---------|---------|---------|---------|---------|---------|---------------------------|
| <b>Asia (cont.)</b>                  |    |           |        |             |             |             |         |         |             |         |         |         |         |         |         |         |         |         |                           |
| Philippines                          | 33 | mean      | 0.30   | <b>3.50</b> | <b>1.10</b> | <b>0.67</b> | 0.56    | 0.13    | <b>1.50</b> |         | 0.22    |         |         |         | 0.06    | 0.20    |         | 1.70    | Malarvannan et al. (2009) |
|                                      |    | min       | 0.06   | 0.49        | 0.14        | 0.05        | 0.25    | 0.05    | 0.05        |         | 0.05    |         |         |         | 0.05    | 0.05    |         | 1.30    |                           |
|                                      |    | max       | 1.90   | 27.00       | 13.00       | 3.70        | 1.40    | 16.00   | 16.00       |         | 0.44    |         |         |         | 0.06    | 0.37    |         | 1.90    |                           |
| Philippines                          | 30 | mean      | 0.14   | 1.30        | 0.37        | 0.22        | 0.27    | 0.02    | 0.07        | 0.02    | 0.19    |         |         |         |         |         | 0.08    | 0.50    | Malarvannan et al. (2013) |
|                                      |    | min       | 0.02   | 0.36        | 0.02        | 0.02        |         | 0.02    | 0.02        | 0.02    | 0.02    |         |         |         |         |         | 0.02    | 0.05    |                           |
|                                      |    | max       | 0.56   | 4.60        | 4.40        | 0.97        |         | 0.35    | 0.49        | 0.07    | 0.75    |         |         |         |         |         | 0.25    | 3.40    |                           |
| Vietnam (Hanoi)                      | 9  | mean      | 0.03   | 0.13        | 0.06        | 0.04        | 0.10    | 0.00    | 0.03        | 0.01    | 0.05    |         |         |         | 0.00    | 0.03    |         | 0.00    | Tue et al. (2010)         |
|                                      |    | min       | 0.02   | 0.07        | 0.00        | 0.00        | 0.06    | 0.00    | 0.00        | 0.00    | 0.00    | 0.02    |         |         | 0.00    | 0.00    |         | 0.00    |                           |
|                                      |    | max       | 0.07   | 0.25        | 0.12        | 0.10        | 0.14    | 0.04    | 0.04        | 0.02    | 0.11    |         |         |         | 0.06    | 0.06    |         | 0.00    |                           |
| <b>Australasia &amp; New Zealand</b> |    |           |        |             |             |             |         |         |             |         |         |         |         |         |         |         |         |         |                           |
| New Zealand                          | 33 | mean      | 0.22   | 2.67        | 0.57        | 0.57        | 0.75    | 0.04    | 0.66        | 0.02    | 0.13    |         |         | 0.02    | 0.03    |         |         | 0.38    | Coakley et al. (2013)     |
|                                      |    | min       | 0.05   | 0.32        | 0.07        | 0.07        | 0.14    | 0.01    | 0.12        | 0.00    | 0.05    |         |         | 0.00    | 0.00    |         |         | 0.07    |                           |
|                                      |    | max       | 0.75   | 7.71        | 1.29        | 1.82        | 3.82    | 0.10    | 0.51        | 0.04    | 0.32    |         |         | 0.05    | 0.20    |         |         | 3.14    |                           |
| <b>Highest mean (World)</b>          |    |           | 0.49   | 3.51        | 1.10        | 0.67        | 1.88    | 0.32    | 1.50        | 0.46    | 1.46    | 0.12    | 0.10    | 0.46    | 0.55    | 1.13    | 0.43    | 3.00    |                           |
| <b>Highest mean (Europe)</b>         |    |           | 0.18   | 3.51        | 1.10        | 0.64        | 1.88    | 0.32    | 0.30        | 0.12    | 0.47    | 0.12    | 0.10    | 0.12    | 0.55    | 0.86    | 0.25    | 2.90    |                           |

Values in bold were used to compile the row “Highest mean (World), the underlined values were used to compile the row “Highest mean (Europe). Shaded in grey are the data used in the mixture risk assessment for breast-feeding infants (see Table S14). Cells left empty mean that the congeners were not measured.

**Table S2: PBDE intakes via food for children (1-3 years), ng/kg bw/d<sup>a</sup>**

| <b>Food exposure scenario</b>                                                       | <b>BDE-28</b> | <b>BDE-47</b> | <b>BDE-99</b> | <b>BDE-100</b> | <b>BDE-153</b> | <b>BDE-154</b> | <b>BDE-183</b> | <b>BDE-209</b> |
|-------------------------------------------------------------------------------------|---------------|---------------|---------------|----------------|----------------|----------------|----------------|----------------|
| High food consumption (95 <sup>th</sup> percentile), upper bound median PBDE levels | 0.79          | 10.38         | 4.14          | 1.86           | 1.75           | 1.90           | 1.78           | 10.54          |
| Average food consumption, upper bound median PBDE levels                            | 0.51          | 4.02          | 1.93          | 0.97           | 1.09           | 1.14           | 1.07           | 6.02           |
| Average food consumption, lower bound median PBDE levels                            | 0.03          | 3.50          | 1.18          | 0.47           | 0.13           | 0.13           | 0.05           | 2.61           |

<sup>a</sup> adapted from EFSA (2011), Table 23, p 74

**Table S3: PBDE intakes via food for adults, ng/kg bw/d**

| <b>Food exposure scenario</b>                                                                         | <b>BDE-28</b> | <b>BDE-47</b> | <b>BDE-99</b> | <b>BDE-100</b> | <b>BDE-153</b> | <b>BDE-154</b> | <b>BDE-183</b> | <b>BDE-209</b> |
|-------------------------------------------------------------------------------------------------------|---------------|---------------|---------------|----------------|----------------|----------------|----------------|----------------|
| High food consumption (95 <sup>th</sup> percentile), upper bound median PBDE levels <sup>a</sup>      | 0.29          | 1.97          | 0.67          | 0.64           | 0.48           | 0.53           | 0.42           | 3.02           |
| Additional dietary PBDE exposure for high and frequent fish consumers, fish with >8% fat <sup>b</sup> | 0.23          | 5.36          | 0.75          | 2.07           | 0.47           | 0.59           | 0.58           | 1.77           |
| Average food consumption, upper bound median PBDE levels <sup>c</sup>                                 | 0.17          | 0.72          | 0.35          | 0.30           | 0.26           | 0.28           | 0.23           | 1.69           |

<sup>a</sup> from Table 18, p 64, EFSA (2011), used for scenarios 1 and 3 in Table 2, main text.

<sup>b</sup> from Table 24, p 75, EFSA (2011), assuming a consumption of 2.6 g fish/kg bw/day, used for scenario 1 in Table 2, main text.

<sup>c</sup> from Table 17, p 63, EFSA (2011), used for scenarios 2 and 4 in Table 2, main text.

**Table S4. PBDE congeners in indoor dust samples (ng/g)**

| Country                        | N  | Statistic       | BDE-28     | BDE-47      | BDE-99      | BDE-100     | BDE-153     | BDE-154    | BDE-183     | BDE-196    | BDE-197     | BDE-203    | BDE-206     | BDE-207     | BDE-208      | BDE-209     | Reference                        |                           |
|--------------------------------|----|-----------------|------------|-------------|-------------|-------------|-------------|------------|-------------|------------|-------------|------------|-------------|-------------|--------------|-------------|----------------------------------|---------------------------|
| <b>Homes - Europe</b>          |    |                 |            |             |             |             |             |            |             |            |             |            |             |             |              |             |                                  |                           |
| Sweden (houses)                | 10 | median          | 1.3        | 42.0        | 52.0        |             | 6.6         |            | 12.0        |            | 5.1         |            | 0.0         | 10.0        | 3.0          | 320         | Thuresson et al. (2012)          |                           |
|                                |    | min             | 0.1        | 0.5         | 1.0         |             | 0.6         |            | 0.7         |            | 1.0         |            | 30.0        | 2.0         | 3.0          | 51          |                                  |                           |
|                                |    | max             | 5.6        | 230.0       | 140.0       |             | 23.0        |            | 49.0        |            | 40.0        |            | 140.0       | 96.0        | 52.0         | 3600        |                                  |                           |
| Sweden (Apartments)            | 34 | median          | 0.8        | 37.0        | 66.0        |             | 7.8         |            | 11.0        |            | 1.4         |            | 0.0         | 20.0        | 0.0          | <u>1100</u> |                                  |                           |
|                                |    | min             | 0.1        | 0.5         | 1.0         |             | 0.2         |            | 0.7         |            | 1.0         |            | 30.0        | 2.0         | 3.0          | 50          |                                  |                           |
|                                |    | max             | 9.2        | 280.0       | 1200.0      |             | 410.0       |            | 110.0       |            | 45.0        |            | 390.0       | 1000.0      | 430.0        | 100000      |                                  |                           |
| Sweden                         | 19 | geometric mean  | 0.7        | 40.0        | 22.0        | 4.9         | 5.1         | 2.5        | 4.0         |            | 1.9         | 1.5        | 23.0        | 17.0        | <u>410.0</u> | 600         | Björklund et al. (2012)          |                           |
|                                |    | min             | 0.2        | 8.5         | 2.3         | 0.9         | 1.0         | 0.6        | 1.1         |            | 0.6         | 0.6        | 7.9         | 6.6         | 180.0        | 190         |                                  |                           |
|                                |    | max             | 12.0       | 250.0       | 130.0       | 33.0        | 14.0        | 8.3        | 31.0        |            | 7.6         | 10.0       | 220.0       | 210.0       | 5100.0       | 9300        |                                  |                           |
| Sweden                         | 5  | mean            | <u>5.4</u> | <u>51.4</u> | <u>78.9</u> | <u>23.9</u> | 4.9         | <u>3.9</u> | 4.9         | 3.9        |             |            | 22.1        | 16.4        |              | 547         | Karlsson et al. (2007)           |                           |
|                                |    | min             | 0.5        | 12.6        | 23.9        | <2.21       | 2.4         | 2.4        | <1.58       | <1.56      |             |            | 2.1         | 1.9         |              | 44          |                                  |                           |
|                                |    | max             | 9.2        | 160.0       | 194.0       | 92.3        | 7.1         | 4.9        | 16.6        | 5.7        |             |            | 44.0        | 41.7        |              | 1560        |                                  |                           |
| Belgium                        | 45 | median          | 0.4        | 8.1         | 8.9         | 1.1         | 2.2         | 0.9        | 1.4         | 2.3        | 0.9         | 1.0        |             |             |              |             | 313                              | D'hollander et al. (2010) |
|                                |    | 95th percentile | 0.9        | 62.4        | 110.0       | 12.1        | 43.9        | 4.7        | 9.5         | 8.3        | 5.4         | 8.2        |             |             |              |             | 1513                             |                           |
| Portugal                       | 11 | mean            |            | 20.0        | 8.9         | 2.7         | 3.6         | 2.5        | 4.6         |            |             |            | 9.3         | 2.0         |              | 307         | Cunha et al. (2010)              |                           |
|                                |    | min             | <i>nd</i>  | <i>nd</i>   | <i>nd</i>   | <i>nd</i>   | <i>nd</i>   | <i>nd</i>  | <i>nd</i>   | <i>nd</i>  | <i>nd</i>   | <i>nd</i>  | <i>nd</i>   | <i>nd</i>   | <i>nd</i>    | <i>nd</i>   |                                  |                           |
|                                |    | max             | 9.0        | 56.0        | 29.0        | 6.0         | 6.0         | 3.0        | 11.0        | 4.0        | 4.0         | 8.0        | 15.0        | 4.0         |              | 884         |                                  |                           |
| Spain                          | 6  | mean            |            | 24.4        | 20.0        | 5.5         | <u>48.1</u> | 3.8        | <u>48.1</u> | <u>8.8</u> | <u>23.6</u> | <u>9.6</u> |             | <u>53.9</u> |              | 400         | Regueiro et al. (2007)           |                           |
|                                |    | min             |            | 6.9         | 6.2         | 1.0         | 4.6         | 0.7        | 4.6         | 3.2        | 3.7         | 3.7        |             | 14.9        |              | 58          |                                  |                           |
|                                |    | max             |            | 69.5        | 60.0        | 18.2        | 142.0       | 9.7        | 142.0       | 15.7       | 58.5        | 16.3       |             | 172.9       |              | 1615        |                                  |                           |
| Czech Republic                 | 25 | mean            | 1.8        | 25.4        | 17.1        | 2.1         | 1.3         | <i>0.1</i> | 29.0        | <i>0.8</i> | 2.1         | <i>0.8</i> | <u>50.0</u> | 41.6        |              | 724         | Kalachova et al. (2012)          |                           |
|                                |    | min             | <i>0.1</i> | <i>0.1</i>  | <i>0.1</i>  | <i>0.1</i>  | <i>0.3</i>  |            | 0.8         |            | 0.8         |            | 2.5         | 2.5         |              | 41          |                                  |                           |
|                                |    | max             | 11.0       | 398.2       | 95.4        | 22.6        | 5.0         |            | 457.3       |            | 15.5        |            | 215.7       | 127.2       |              | 5481        |                                  |                           |
| <b>Homes - North America</b>   |    |                 |            |             |             |             |             |            |             |            |             |            |             |             |              |             |                                  |                           |
| United States                  | 7  | mean            | 6.1        | 571.1       | 842.7       | 136.0       | 58.7        | 49.6       | 10.9        | 3.0        |             |            | 65.4        | 45.7        |              | 1275        | Wei et al. (2009)                |                           |
|                                |    | min             | 0.5        | 22.3        | 43.0        | 9.0         | 4.0         | 3.0        | 4.0         | 2.0        |             |            | 15.6        | 15.0        |              | 360         |                                  |                           |
|                                |    | max             | 11.5       | 2075.0      | 2924.0      | 464.0       | 141.0       | 117.0      | 27.0        | 5.0        |             |            | 104.0       | 93.0        |              | 4156        |                                  |                           |
| United States                  | 17 | mean            | 21.0       | 1220.0      | 1700.0      | 274.0       | 181.0       | 156.0      | 31.0        | 15.0       | 17.0        |            | 51.0        | 30.0        | 35.0         | 2090        | Stapleton et al. (2005)          |                           |
|                                |    | min             | 2.9        | 103.0       | 162.0       | 25.9        | 11.7        | 11.8       | 1.3         | <i>nd</i>  | <i>nd</i>   |            | <i>nd</i>   | <i>nd</i>   | <i>nd</i>    | 162         |                                  |                           |
|                                |    | max             | 76.5       | 7610.0      | 13800.0     | 2090.0      | 1510.0      | 1250.0     | 168.0       | 38.6       | 77.2        |            | 239.0       | 109.0       | 108.0        | 8750        |                                  |                           |
| United States                  | 12 | mean            | 0.3        | 93.0        | 176.0       | 30.6        | 30.2        | 17.4       | 18.0        |            |             | 3.0        |             | <i>0.1</i>  |              | 2810        | Johnson-Restrepo & Kannan (2009) |                           |
|                                |    | min             | <0.1       | 16.7        | 25.6        | 0.8         | <0.04       | 2.5        | <21         |            |             | <3         |             | <0.1        |              | 327         |                                  |                           |
|                                |    | max             | 1.3        | 354.0       | 664.0       | 122.0       | 81.5        | 56.9       | 64.0        |            |             | <3         |             | <0.1        |              | 9210        |                                  |                           |
| United States (Vacuum cleaner) | 20 | geometric mean  | 6.4        | 338.0       | 536.0       | 77.0        | 47.0        | 35.0       | 15.1        | 3.9        | 5.6         | 4.9        | 40.5        | 26.6        | 29.4         | 1811        | Allen et al. (2008)              |                           |
|                                |    | min             | 1.6        | 22.5        | 86.6        | 5.2         | 1.8         | 0.5        | 2.6         | 0.1        | <0.1        | 0.1        | 3.8         | 0.3         | 0.6          | 228         |                                  |                           |
|                                |    | max             | 58.6       | 5596.0      | 8847.0      | 1475.0      | 783.5       | 626.4      | 410.9       | 89.5       | 198.9       | 85.2       | 1711.0      | 1427.0      | 1786.0       | 263000      |                                  |                           |

| Country                                      | N  | Statistic | BDE-28      | BDE-47        | BDE-99  | BDE-100 | BDE-153      | BDE-154      | BDE-183 | BDE-196 | BDE-197 | BDE-203 | BDE-206      | BDE-207 | BDE-208 | BDE-209 | Reference                  |
|----------------------------------------------|----|-----------|-------------|---------------|---------|---------|--------------|--------------|---------|---------|---------|---------|--------------|---------|---------|---------|----------------------------|
| <b>Homes – North America (Cont.)</b>         |    |           |             |               |         |         |              |              |         |         |         |         |              |         |         |         |                            |
| United States<br>(Living room)               | 20 | geometric |             |               |         |         |              |              |         |         |         |         |              |         |         |         | Allen et al.<br>(2008)     |
|                                              |    | mean      | 16.3        | <b>1865.0</b> | 2460.0  | 436.0   | <b>234.4</b> | <b>182.8</b> | 27.9    | 3.6     | 2.7     | 3.6     | 76.3         | 45.9    | 35.6    | 4502    |                            |
|                                              |    | min       | 1.6         | 445.4         | 330.6   | 71.0    | 27.7         | 27.4         | 1.7     | 0.1     | <0.1    | 0.1     | 8.1          | 1.2     | 1.9     | 792     |                            |
|                                              |    | max       | 120.5       | 16840.0       | 24510.0 | 4274.0  | 2377.0       | 2061.0       | 229.7   | 135.0   | 84.0    | 54.4    | 1484.0       | 599.8   | 536.4   | 184600  |                            |
| United States<br>(Bedroom)                   | 20 | geometric |             |               |         |         |              |              |         |         |         |         |              |         |         |         |                            |
|                                              |    | mean      | 10.5        | 837.0         | 1170.0  | 204.0   | 124.2        | 94.4         | 32.9    | 2.6     | 3.3     | 3.6     | 48.1         | 25.3    | 17.5    | 1703    |                            |
|                                              |    | min       | 0.7         | 54.3          | 56.5    | 11.4    | 4.2          | 4.3          | 0.1     | 0.1     | 0.1     | 0.1     | 4.5          | 0.3     | 0.7     | 24      |                            |
|                                              |    | max       | 119.4       | 15000.0       | 22850.0 | 3786.0  | 2870.0       | 2332.0       | 1617.0  | 315.2   | 802.4   | 293.6   | 803.3        | 539.3   | 531.4   | 36130   |                            |
| United States<br>(Infertile couples)         | 50 | geometric |             |               |         |         |              |              |         |         |         |         |              |         |         |         | Johnson et al.<br>(2010)   |
|                                              |    | mean      | 13.0        | 543.0         | 643.0   | 135.0   | 78.6         | 63.2         | 20.0    |         |         | 12.1    | <b>163.0</b> | 63.1    | 35.3    | 1906    |                            |
|                                              |    | min       | 3.1         | 100.0         | 79.3    | 19.0    | 13.2         | 6.7          | 3.8     |         | nd      | nd      | 1.3          | 33.9    | 12.4    | 8.5     |                            |
|                                              |    | max       | 84.0        | 8627.0        | 12967.0 | 2164.0  | 1352.0       | 1093.0       | 688.0   | nd      | nd      | 243.0   | 3772.0       | 1492.0  | 853.0   | 32366   |                            |
| Hawaii                                       | 1  |           | <b>39.0</b> | 1042.0        | 747.0   | 111.0   | 42.0         | 14.0         | 4.6     |         |         |         | 55.0         | 1.0     |         | 40      | Wang et al.<br>(2008)      |
| <b>Homes - Asia</b>                          |    |           |             |               |         |         |              |              |         |         |         |         |              |         |         |         |                            |
| China<br>(E-waste recycling area)            | 10 | median    |             | 8.0           | 13.0    | 1.5     | 11.3         | 3.3          | 26.6    | 20.2    | 13.8    | 20.5    | 105.6        | 65.0    | 36.1    | 1490    | Zheng et al.<br>(2011)     |
|                                              |    | min       |             | 4.7           | 7.2     | nd      | 2.7          | 0.8          | 6.0     | 4.1     | 4.2     | 4.3     | 38.8         | 17.1    | 9.5     | 721     |                            |
|                                              |    | max       |             | 58.5          | 120.0   | 10.5    | 40.5         | 10.1         | 141.0   | 35.2    | 73.1    | 29.6    | 249.0        | 140.0   | 64.1    | 4920    |                            |
| China<br>(Urban area)                        | 27 | median    |             | 7.3           | 7.1     | 0.8     | 2.8          | 1.0          | 8.4     | 7.4     | 6.0     | 7.3     | 162.0        | 151.0   | 75.0    | 4040    |                            |
|                                              |    | min       |             | 0.8           | 0.7     | 0.2     | 0.3          | nd           | nd      | nd      | nd      | nd      | 19.6         | 4.2     | 2.4     | 498     |                            |
|                                              |    | max       |             | 543.0         | 842.0   | 186.0   | 60.4         | 47.7         | 65.9    | 69.7    | 22.7    | 21.1    | 700.0        | 837.0   | 372.0   | 40500   |                            |
| China<br>(Rural area)                        | 10 | median    |             | 1.2           | 1.6     |         | 1.1          |              | 2.3     | 10.0    | 4.1     | 9.8     | 63.7         | 43.2    | 24.0    | 670     |                            |
|                                              |    | min       |             | nd            | nd      | nd      | 0.6          | nd           | nd      | 5.4     | 0.1     | 5.0     | 26.6         | 19.9    | 11.7    | 182     |                            |
|                                              |    | max       |             | 3.9           | 5.1     | 0.3     | 4.1          | 1.8          | 5.6     | 16.5    | 18.1    | 17.9    | 101.0        | 60.0    | 37.7    | 1680    |                            |
| China                                        | 23 | median    | 37.0        | 102.0         | 75.0    | 85.0    | 11.0         | 8.4          | 78.0    | 12.0    | 15.0    |         | 50.0         | 47.0    |         | 975     | Kang et al.<br>(2011)      |
|                                              |    | min       | 7.0         | 27.0          | 15.0    | 22.0    | 0.0          | 0.0          | 14.0    | 1.5     | 2.3     |         | 13.0         | 13.0    |         | 346     |                            |
|                                              |    | max       | 122.0       | 2740.0        | 9447.0  | 221.0   | 650.0        | 714.0        | 797.0   | 36.0    | 277.0   |         | 564.0        | 635.0   |         | 15795   |                            |
| <b>Homes – Australasia &amp; New Zealand</b> |    |           |             |               |         |         |              |              |         |         |         |         |              |         |         |         |                            |
| Australia                                    | 30 | geometric |             |               |         |         |              |              |         |         |         |         |              |         |         |         | Stasinska et al.<br>(2013) |
|                                              |    | mean      | 0.7         | 28.8          | 37.7    | 6.8     | 5.3          | 3.7          | 0.3     | 0.1     | 0.1     | 2.4     | 2.5          | 0.1     | 20.9    | 22      |                            |
|                                              |    | min       | nd          | 2.6           | 2.9     | 0.5     | nd           | nd           | 0.5     | nd      | 0.4     | nd      | nd           | nd      | nd      | nd      |                            |
|                                              |    | max       | 10.0        | 391.0         | 372.0   | 71.2    | 59.9         | 31.7         | 44.0    | 784.0   | 51.2    | 410.0   | 12300.0      | 3390.0  | 934.0   | 82200   |                            |
| Australia                                    | 5  | mean      |             | 23.8          | 35.7    | 6.9     | 7.0          | 3.9          | 15.4    | 5.3     | 6.3     |         | 12.5         | 10.7    |         | 243     | Toms et al.<br>(2009)      |
|                                              |    | min       |             | 7.8           | 10.8    | 0.7     | 2.9          | 1.3          | 2.9     | 1.1     | 1.4     |         | 2.8          | 4.0     |         | 37      |                            |
|                                              |    | max       |             | 53.8          | 81.8    | 16.9    | 14.0         | 8.7          | 28.0    | 13.6    | 11.7    |         | 27.9         | 16.9    |         | 587     |                            |
| New Zealand<br>(floor)                       | 33 | mean      | 0.7         | 30.2          | 51.8    | 9.7     | 8.8          | 4.7          | 12.8    | 4.7     | 4.7     | 2.9     | 114.4        |         |         | 2505    | Coakley et al.<br>(2013)   |
|                                              |    | min       | 0.1         | 0.3           | 3.3     | 0.3     | 0.3          | 0.3          | 0.3     | 0.3     | 0.3     | 0.3     | 3.2          |         |         | 29      |                            |
|                                              |    | max       | 1.3         | 98.0          | 219.1   | 41.1    | 58.9         | 19.8         | 238.4   | 44.2    | 68.0    | 25.0    | 989.3        |         |         | 27394   |                            |
| New Zealand<br>(mattress)                    | 16 | mean      | 1.2         | 56.1          | 83.9    | 16.1    | 10.6         | 7.1          | 7.5     | 10.3    | 5.6     | 8.1     | 163.6        |         |         | 2703    |                            |
|                                              |    | min       | 0.1         | 6.5           | 8.1     | 0.3     | 0.3          | 0.3          | 0.3     | 0.3     | 0.3     | 0.3     | 3.5          |         |         | 106     |                            |
|                                              |    | max       | 7.7         | 288.4         | 540.3   | 94.1    | 58.2         | 43.1         | 21.1    | 34.3    | 17.5    | 30.3    | 1253.3       |         |         | 21956   |                            |

| Country                                        | N  | Statistic                   | BDE-28    | BDE-47  | BDE-99        | BDE-100      | BDE-153   | BDE-154   | BDE-183      | BDE-196     | BDE-197     | BDE-203      | BDE-206   | BDE-207      | BDE-208      | BDE-209     | Reference                  |
|------------------------------------------------|----|-----------------------------|-----------|---------|---------------|--------------|-----------|-----------|--------------|-------------|-------------|--------------|-----------|--------------|--------------|-------------|----------------------------|
| <b>Offices - Europe</b>                        |    |                             |           |         |               |              |           |           |              |             |             |              |           |              |              |             |                            |
| Belgium                                        | 10 | median                      | 2.1       | 21.1    | 45.4          | 6.8          | 12.1      | 5.5       | 23.8         | 6.6         | 9.5         | 4.7          |           |              |              | 443         | D'hollander et al. (2010)  |
|                                                |    | 95 <sup>th</sup> percentile | 5.3       | 61.5    | 133.0         | 20.3         | 663.0     | 87.1      | 3090.0       | 633.0       | 1200.0      | 453.0        |           |              |              | 6680        |                            |
| Sweden                                         | 10 | median                      | 1.2       | 52.0    | 92.0          |              | 23.0      |           | 55.0         |             | 29.0        |              | 0.0       | 44.0         | 17.0         | 780         | Thuresson et al. (2012)    |
|                                                |    | min                         | 0.1       | 14.0    | 14.0          |              | 4.3       |           | 15.0         |             | 7.0         |              | 30.0      | 20.0         | 10.0         | 540         |                            |
|                                                |    | max                         | 5.4       | 390.0   | 770.0         |              | 100.0     |           | 160.0        |             | 100.0       |              | 340.0     | 160.0        | 96.0         | 12000       |                            |
| <b>Offices – North America</b>                 |    |                             |           |         |               |              |           |           |              |             |             |              |           |              |              |             |                            |
| United States                                  | 31 | geometric mean              | 7.5       | 697.0   | 915.0         | 195.0        | 138.0     | 115.0     | 81.0         | 29.0        | <b>32.0</b> | 4.9          | 153.0     | 125.0        | 62.0         | 4204        | Watkins et al. (2013)      |
|                                                |    | min                         | 0.4       | 37.0    | 0.4           | 13.0         | 11.0      | 8.0       | 15.0         | 7.0         | 4.0         | 1.0          | 29.0      | 22.0         | 10.0         | 912         |                            |
|                                                |    | max                         | 207.0     | 19494.0 | 32831.0       | 8672.0       | 5973.0    | 5202.0    | 12970.0      | 2858.0      | 6109.0      | 359.0        | 3395.0    | 4312.0       | 1710.0       | 106204      |                            |
| United States                                  | 10 | mean                        | 18.0      | 1650.0  | <b>3310.0</b> | <b>525.0</b> | 126.0     | 95.0      | <b>130.0</b> |             |             | <b>237.0</b> | 117.0     | <b>357.0</b> | <b>445.0</b> | 6930        | Batterman et al. (2010)    |
|                                                |    | min                         | <i>nd</i> | 130.0   | 486.0         | 73.0         | <i>nd</i> | 17.0      | <i>nd</i>    |             |             | <i>nd</i>    | <i>nd</i> | <i>nd</i>    | <i>nd</i>    | <i>nd</i>   |                            |
|                                                |    | max                         | 87.0      | 6400.0  | 10600.0       | 1820.0       | 627.0     | 951.0     | 5060.0       |             |             |              | 722.0     | 431.0        | 1770.0       | 1400.0      |                            |
| United States (computer labs)                  | 2  | mean                        | 14.3      | 456.0   | 776.0         | 135.0        | 144.0     | 95.0      | 130.0        |             |             | 109.0        |           |              |              | 7500        | CARB (2005) in NCEA (2010) |
| <b>Offices - Asia</b>                          |    |                             |           |         |               |              |           |           |              |             |             |              |           |              |              |             |                            |
| China                                          | 55 | median                      | 23.0      | 109.0   | 186.0         | 144.0        | 25.0      | 18.0      | 28.0         | 7.4         | 9.5         |              | 65.0      | 62.0         |              | 1401        | Kang et al. (2011)         |
|                                                |    | min                         | 1.7       | 2.0     | 6.0           | 10.0         | 0.0       | 0.0       | 2.6          | 1.0         | 0.0         |              | 10.0      | 9.0          |              | 103         |                            |
|                                                |    | max                         | 100.0     | 1586.0  | 10100.0       | 458.0        | 908.0     | 876.0     | 133.0        | 133.0       | 96.0        |              |           | 463.0        | 455.0        |             |                            |
| <b>Offices – Australasia &amp; New Zealand</b> |    |                             |           |         |               |              |           |           |              |             |             |              |           |              |              |             |                            |
| Australia                                      | 3  | mean                        |           | 107.2   | 153.4         | 30.1         | 24.2      | 13.4      | 38.4         | 10.2        | 16.7        |              | 67.1      | 50.6         |              | 1299        | Toms et al. (2009)         |
|                                                |    | min                         |           | 46.6    | 49.4          | 9.2          | 6.0       | 3.9       | 12.1         | 4.2         | 5.5         |              | 20.9      | 15.9         |              | 401         |                            |
|                                                |    | max                         |           | 210.0   | 294.0         | 61.2         | 33.8      | 25.0      | 63.8         | 14.7        | 27.1        |              | 94.3      | 63.4         |              | 2230        |                            |
| Australia                                      | 2  | mean                        |           | 113.3   | 283.3         | 36.2         | 39.5      |           | 70.1         | 17.3        | 21.6        |              | 143.2     | 76.9         |              | 1212        | Hearn et al. (2013)        |
| <b>Schools and day care centres - Europe</b>   |    |                             |           |         |               |              |           |           |              |             |             |              |           |              |              |             |                            |
| United Kingdom                                 | 43 | mean                        | 1.4       | 32.0    | 54.0          | 10.0         | 28.0      | 5.0       | 5.1          | <b>77.0</b> | 5.6         | 5.6          |           |              |              | <b>8500</b> | Harrad et al. (2010)       |
|                                                |    | min                         | <i>nd</i> | 1.6     | 1.1           | <i>nd</i>    | <i>nd</i> | <i>nd</i> | <i>nd</i>    | <i>nd</i>   | <i>nd</i>   | <i>nd</i>    | <i>nd</i> |              |              | 49          |                            |
|                                                |    | max                         | 25.0      | 120.0   | 270.0         | 50.0         | 310.0     | 26.0      | 48.0         | 42.0        | 35.0        | 50.0         |           |              |              | 88000       |                            |
| Sweden                                         | 10 | median                      | 2.8       | 120.0   | 110.0         |              | 12.0      |           | 6.5          |             | 4.2         |              | 0.0       | 15.0         | 8.0          | 580         | Thuresson et al. (2012)    |
|                                                |    | min                         | 0.1       | 31.0    | 42.0          |              | 6.0       |           | 2.7          |             | 1.7         |              | 30.0      | 7.0          | 4.0          | 180         |                            |
|                                                |    | max                         | 8.2       | 910.0   | 550.0         |              | 19.0      |           | 15.0         |             | 6.5         |              | 110.0     | 58.0         | 29.0         | 3500        |                            |
| <b>Level 1 – highest overall mean</b>          |    |                             | 39.0      | 1865.0  | 3310.0        | 525.0        | 234.4     | 182.8     | 130.0        | 77.0        | 32.0        | 237.0        | 163.6     | 357.0        | 445.0        | 8500.0      |                            |
| <b>Level 2 (Europe only)</b>                   |    |                             |           |         |               |              |           |           |              |             |             |              |           |              |              |             |                            |
| <b>Highest mean, homes</b>                     |    |                             | 5.4       | 51.4    | 78.9          | 23.9         | 48.1      | 3.9       | 48.1         | 8.8         | 23.6        | 9.6          | 50.0      | 53.9         | 410.0        | 1100        |                            |

Values in bold were used to compile the row “Level 1 - highest overall mean, the underlined values were used to compile the row “Highest mean, homes” (Europe). Shaded in grey are the data used in subsequent analyses. Cells left empty mean that the congeners were not measured; nd = not detected. The Values from Bjorklund et al. (2012) are for researcher-collected dust samples.



**Table S5. PBDE congeners in serum and blood samples (ng/g lipid weight)**

| Country                              | N  | Statistic | BDE-28 | BDE-47 | BDE-99 | BDE-100 | BDE-153 | BDE-154 | BDE-183 | BDE-196 | BDE-197 | BDE-201 | BDE-202 | BDE-203 | BDE-206 | BDE-207 | BDE-208 | BDE-209 | Reference               |
|--------------------------------------|----|-----------|--------|--------|--------|---------|---------|---------|---------|---------|---------|---------|---------|---------|---------|---------|---------|---------|-------------------------|
| <b>Adults, serum - Europe</b>        |    |           |        |        |        |         |         |         |         |         |         |         |         |         |         |         |         |         |                         |
| France, mothers                      | 91 | mean      | 0.15   | 2.81   | 3.59   | 0.70    | 0.89    | 0.14    | 0.25    | 0.32    | 1.06    | 0.38    | 0.12    | 0.23    | 1.96    | 2.55    | 0.86    | 0.47    | Antignac et al. (2009)  |
|                                      |    | min       | 0.04   | 0.56   | 0.53   | 0.11    | 0.06    | 0.01    | 0.03    | 0.06    | 0.10    | 0.05    | 0.04    | 0.06    | 0.22    | 0.19    | 0.05    | 0.79    |                         |
|                                      |    | max       | 0.39   | 4.84   | 18.02  | 4.19    | 9.66    | 0.94    | 2.16    | 0.98    | 5.04    | 3.00    | 0.27    | 0.83    | 10.08   | 10.55   | 7.07    | 37.43   |                         |
| Sweden, mothers                      | 9  | median    | 0.34   | 1.46   | 0.20   | 0.32    | 1.67    | 0.25    |         |         | 0.69    |         |         | 0.45    |         | 0.88    |         | 3.17    | Jakobsson et al. (2012) |
|                                      |    | min       | 0.20   | 0.58   | 0.05   | 0.32    | 1.03    | 0.03    |         |         | 0.45    |         |         | 0.15    |         | 0.31    |         | 1.92    |                         |
|                                      |    | max       | 0.77   | 5.34   | 0.70   | 1.24    | 3.99    | 0.71    |         |         | 2.64    |         |         | 6.33    |         | 1.58    |         | 7.39    |                         |
| Spain, mothers                       | 61 | median    | 0.06   | 2.40   | 2.60   | 1.60    | 0.86    | <0.10   | 0.47    | 0.02    | 0.10    |         |         |         |         |         |         | 1.10    | Gomara et al. (2007)    |
|                                      |    | min       | <0.06  | 0.30   | 1.40   | 0.94    | <0.18   | <0.10   | <0.06   | <0.02   | <0.10   |         |         |         |         |         |         | <1.1    |                         |
|                                      |    | max       | 0.43   | 0.90   | 6.90   | 3.00    | 2.50    | <0.10   | 2.30    | 1.20    | 1.30    |         |         |         |         |         |         | 20.00   |                         |
| Spain, fathers                       | 51 | median    | <0.06  | 2.30   | 2.30   | 1.60    | 0.81    | 0.10    | 0.60    | 0.02    | 0.10    |         |         |         |         |         |         | 1.10    |                         |
|                                      |    | min       | <0.06  | 0.34   | 1.40   | 0.94    | <0.18   | <0.10   | <0.06   | <0.02   | <0.10   |         |         |         |         |         |         | <1.1    |                         |
|                                      |    | max       | <0.06  | 7.30   | 5.30   | 2.40    | 3.20    | 0.11    | 2.60    | 3.50    | 11.00   |         |         |         |         |         |         | 59.00   |                         |
| Spain, mothers                       | 52 | median    | <0.06  | 2.60   | 2.30   | 1.20    | 0.77    | <0.10   | 0.06    | 0.10    |         |         |         |         |         |         |         | 1.10    |                         |
|                                      |    | min       | <0.06  | 0.51   | 1.10   | 0.77    | <0.18   | <0.10   | <0.06   | <0.02   | <0.10   |         |         |         |         |         |         | <1.1    |                         |
|                                      |    | max       | <0.06  | 22.00  | 12.00  | 4.20    | 3.30    | <0.10   | 2.50    | <0.02   | 0.47    |         |         |         |         |         |         | 31.00   |                         |
| Spain, fathers                       | 53 | median    |        | 2.70   | 2.40   | 1.30    | 0.86    |         | 0.06    |         |         |         |         |         |         |         |         | 1.10    |                         |
|                                      |    | min       | <0.06  | 0.26   | 1.10   | 0.81    | <0.18   | <0.10   | <0.06   | <0.02   | <0.10   |         |         |         |         |         |         | <1.1    |                         |
|                                      |    | max       | <0.06  | 6.30   | 5.90   | 2.10    | 4.60    | <0.10   | 3.10    | <0.02   | <0.10   |         |         |         |         |         |         | 91.00   |                         |
| <b>Adults, serum – North America</b> |    |           |        |        |        |         |         |         |         |         |         |         |         |         |         |         |         |         |                         |
| United States, mothers               | 20 | mean      | 0.72   | 12.00  | 1.70   | 1.80    | 7.60    |         | 0.00    |         | 0.33    |         |         |         |         |         |         | 1.70    | Lunder et al. (2010)    |
|                                      |    | min       | 0.20   | 3.10   | 0.40   | 0.40    | 1.40    |         | 0.00    |         | 0.11    |         |         |         |         |         |         | 0.94    |                         |
|                                      |    | max       | 2.50   | 40.00  | 5.20   | 7.00    | 32.00   |         | 0.50    |         | 0.82    |         |         |         |         |         |         | 3.20    |                         |
| <b>Adults, serum - Asia</b>          |    |           |        |        |        |         |         |         |         |         |         |         |         |         |         |         |         |         |                         |
| India <sup>1</sup>                   | 20 | mean      |        | 0.41   | 0.68   | 0.03    | 0.63    | 0.36    | 0.58    |         | 0.79    |         |         |         |         | 1.90    |         | 27.00   | Eguchi et al. (2012)    |
|                                      |    | min       |        | 0.03   | 0.03   | 0.03    | 0.05    | 0.05    | 0.05    |         | 0.05    |         |         |         |         | 0.05    |         | 0.39    |                         |
|                                      |    | max       |        | 1.50   | 3.20   | 1.10    | 2.70    | 1.40    | 4.30    |         | 3.50    |         |         |         |         | 23.00   |         | 270.00  |                         |
| China, e-waste workers               | 20 | median    | 2.60   | 6.70   | 1.40   | 1.00    | 9.00    | 0.80    | 4.70    | 0.40    | 2.10    |         |         | 0.30    | 0.70    | 10.00   | 2.90    | 83.50   | Qu et al. (2007)        |
|                                      |    | min       | 0.70   | 1.50   | 0.40   | 0.10    | 0.90    | 0.10    | 0.50    | 0.10    | 0.10    |         |         | 0.10    | 0.10    | 0.90    | 0.30    | nd      |                         |
|                                      |    | max       | 148.00 | 161.00 | 29.70  | 6.30    | 245.00  | 3.50    | 60.20   | 2.80    | 31.20   |         |         | 8.00    | 11.00   | 66.20   | 18.70   | 3436    |                         |
| China, Rural area                    | 15 | median    | 1.00   | 3.40   | 0.40   | 0.40    | 1.60    | 0.10    | 1.00    | 0.20    | 1.30    |         |         | 0.30    | 0.40    | 5.20    | 1.30    | 18.50   |                         |
|                                      |    | min       | 0.60   | 1.40   | nd     | nd      | 0.05    | nd      | nd      | 0.08    | 0.40    |         |         | 0.10    | 0.20    | 2.80    | 0.60    | nd      |                         |
|                                      |    | max       | 2.30   | 5.70   | 1.50   | 1.30    | 133.00  | 0.80    | 39.70   | 0.40    | 5.80    |         |         | 0.50    | 0.60    | 7.90    | 1.70    | 377     |                         |
| China                                | 20 | median    | 0.40   | 1.10   | 0.40   | 0.20    | 1.30    | 0.10    | 0.30    |         | 0.20    |         |         |         |         | 0.50    |         | 5.70    |                         |
|                                      |    | min       | 0.20   | 0.50   | 0.10   | 0.10    | 0.40    | nd      | nd      | nd      | nd      |         |         | nd      | nd      | nd      | nd      | nd      |                         |
|                                      |    | max       | 2.70   | 3.60   | 7.40   | 2.30    | 6.40    | 1.20    | 1.30    | 0.10    | 0.50    |         |         | 0.10    | 1.20    | 4.30    | 1.30    | 63.20   |                         |
| China, e-waste workers               | 26 | mean      | 3.10   | 13.00  | 6.60   | 3.70    | 37.00   | 5.30    | 9.20    | 3.70    | 29.00   |         |         | 3.70    | 23.00   | 77.00   | 17.00   | 340     | Bi et al. (2007)        |
|                                      |    | min       | nd     | nd     | nd     | nd      | 3.30    | nd      | nd      | nd      | 0.27    |         |         | nd      | nd      | nd      | nd      | nd      |                         |
|                                      |    | max       | 78.00  | 180.00 | 61.00  | 26.00   | 270.00  | 31.00   | 200.00  | 35.00   | 2400    |         |         | 76.00   | 84.00   | 1400    | 210     | 3100    |                         |
| China, Fishing community             | 21 | median    | 0.58   | 1.30   | 1.10   |         | 4.60    | 0.41    | 1.40    | 0.99    | 9.30    |         |         | 2.00    | 11.00   | 39.00   | 9.00    | 130     |                         |
|                                      |    | min       | nd     | nd     | nd     | nd      | nd      | nd      | nd      | nd      | nd      |         |         | nd      | nd      | nd      | nd      | nd      |                         |
|                                      |    | max       | 2.00   | 4.30   | 3.50   | nd      | 10.00   | 1.90    | 3.10    | 2.80    | 28.00   |         |         | 6.70    | 40.00   | 96.00   | 24.00   | 370     |                         |

<sup>1</sup> transformed from data reporting pg/g wet weight, assuming 1% lipid in serum

| Country                             | N   | Statistic                   | BDE-28 | BDE-47 | BDE-99 | BDE-100 | BDE-153 | BDE-154 | BDE-183 | BDE-196 | BDE-197 | BDE-201 | BDE-202 | BDE-203 | BDE-206     | BDE-207 | BDE-208 | BDE-209 | Reference               |                      |
|-------------------------------------|-----|-----------------------------|--------|--------|--------|---------|---------|---------|---------|---------|---------|---------|---------|---------|-------------|---------|---------|---------|-------------------------|----------------------|
| <b>Adults, serum – Asia (cont.)</b> |     |                             |        |        |        |         |         |         |         |         |         |         |         |         |             |         |         |         |                         |                      |
| China                               | 115 | mean                        | 0.38   | 1.19   | 0.95   | 0.25    | 0.48    | 0.15    | 0.59    | 0.23    | 1.72    | 0.36    |         | 0.28    |             | 2.08    | 1.08    | 36.40   | Zhu et al. (2009)       |                      |
|                                     |     | min                         | 0.00   | 0.01   | 0.01   | 0.00    | 0.00    | 0.00    | 0.00    | 0.00    | 0.00    | 0.00    | 0.00    |         | 0.00        |         | 0.00    | 0.00    |                         | 0.00                 |
|                                     |     | max                         | 2.88   | 11.50  | 5.22   | 1.26    | 2.65    | 2.09    | 7.10    | 12.50   | 12.50   | 11.60   |         | 18.00   |             | 78.60   | 48.10   | 1770    |                         |                      |
| <b>Adults, blood - Asia</b>         |     |                             |        |        |        |         |         |         |         |         |         |         |         |         |             |         |         |         |                         |                      |
| China, mothers                      | 31  | mean                        | 1.15   | 2.24   | 0.71   | 0.20    | 3.06    | 0.22    | 0.41    |         | 2.64    |         |         |         |             |         |         |         | 5.05                    | Zhao et al. (2013)   |
|                                     |     | min                         | 0.51   | 1.43   | 0.26   | 0.00    | 1.77    | 0.00    | 0.00    |         | 1.07    |         |         |         |             |         |         |         | 2.87                    |                      |
|                                     |     | max                         | 2.61   | 4.48   | 2.07   | 0.76    | 5.30    | 0.61    | 1.70    |         | 5.01    |         |         |         |             |         |         |         | 7.96                    |                      |
| Japan                               | 72  | mean                        | 0.13   | 0.46   | 0.06   | 0.21    | 0.87    | 0.08    | 0.04    | 0.10    | 0.30    |         |         |         | <i>0.05</i> | 0.41    |         |         | 1.00                    | Uemura et al. (2010) |
|                                     |     | 25th percentile             | 0.05   | 0.20   | 0.03   | 0.09    | 0.45    | 0.03    | 0.02    | 0.04    | 0.19    |         |         |         | <i>0.03</i> | 0.32    |         |         | 0.60                    |                      |
|                                     |     | 75th percentile             | 0.14   | 0.58   | 0.07   | 0.23    | 1.10    | 0.08    | 0.07    | 0.12    | 0.36    |         |         |         | <i>0.07</i> | 0.49    |         |         | 1.30                    |                      |
| <b>Children, serum</b>              |     |                             |        |        |        |         |         |         |         |         |         |         |         |         |             |         |         |         |                         |                      |
| United States, 1.5-4 years old      | 20  | median                      | 1.00   | 31.00  | 6.20   | 6.20    | 13.00   | 3.20    |         |         | 0.49    |         |         |         |             |         |         |         | 1.70                    | Lunder at al. (2010) |
|                                     |     | min                         | 0.30   | 11.00  | 1.80   | 2.10    | 3.40    | 0.45    | nd      |         | 0.13    |         |         |         |             |         |         |         | 0.90                    |                      |
|                                     |     | max                         | 2.20   | 65.00  | 15.00  | 14.00   | 32.00   | 38.00   | 1.70    |         | 2.00    |         |         |         |             |         |         |         | 19.00                   |                      |
| Sweden, 11 – 15 months old          | 24  | geometric mean              | 0.085  | 1.4    | 0.27   | 0.29    | 0.93    |         |         | 0.12    | 0.47    |         |         | 1.1     | 0.27        | 0.61    | 0.16    | 2.1     | Sahlstrom et al. (2014) |                      |
|                                     |     | median                      | 0.057  | 1.3    | 0.22   | 0.28    | 1.2     |         |         | 0.088   | 0.42    |         |         | 0.81    | 0.28        | 0.48    | 0.13    | 1.5     |                         |                      |
|                                     |     | max                         | 0.61   | 5.6    | 2.8    | 2.6     | 17      |         |         | 1.2     | 6.5     |         |         | 8.8     | 2.8         | 13      | 2.0     | 45      |                         |                      |
|                                     |     | min                         | 0.042  | 0.18   | 0.11   | 0.11    | 0.17    |         |         | 0.078   | 0.27    |         |         | 0.71    | 0.14        | 0.28    | 0.053   | 1.6     |                         |                      |
| United States, 2-8 years old        | 68  | geometric mean              | 2.3    | 62     | 13     | 12.7    | 16      | 1.1     | 0.2     |         |         |         |         |         |             |         |         |         | 2.8                     | Wu et al. (2015)     |
|                                     |     | 95 <sup>th</sup> percentile | 11.6   | 364    | 78     | 64      | 87      | 5.3     | 0.8     |         |         |         |         |         |             |         |         |         | 9.6                     |                      |
| <b>Children, blood - Asia</b>       |     |                             |        |        |        |         |         |         |         |         |         |         |         |         |             |         |         |         |                         |                      |
| China, 9-12 years old               | 58  | median                      | 1.06   | 1.01   | 0.05   | 0.05    | 0.61    | 0.06    | 0.07    |         | 0.26    |         |         |         |             |         |         |         | 1.73                    | Zhang et al. (2011)  |
|                                     |     | min                         | 0.27   | 0.10   | 0.05   | 0.05    | 0.08    | 0.06    | 0.07    |         | 0.26    |         |         |         |             |         |         |         | 1.73                    |                      |
|                                     |     | max                         | 4.49   | 6.18   | 1.37   | 0.50    | 4.74    | 9.74    | 2.50    |         | 6.37    |         |         |         |             |         |         |         | 13.30                   |                      |

Values in italics are below limit of detection, nd = not detected, cells left empty mean congeners were not measured.

Data used in subsequent analyses are shaded grey.

**Table S6: Mixture risk assessment for breast-feeding infants (0-3 months), supplemental information to Table 2, main text**

| Parameter                                | units                            | Statistic | BDE-28                                   | BDE-47      | BDE-99      | BDE-100     | BDE-153     | BDE-154     | BDE-183     | BDE-196       | BDE-197       | BDE-201       | BDE-202       | BDE-203       | BDE-206       | BDE-207       | BDE-208       | BDE-209       | Sum                 | Reference  |                                   |
|------------------------------------------|----------------------------------|-----------|------------------------------------------|-------------|-------------|-------------|-------------|-------------|-------------|---------------|---------------|---------------|---------------|---------------|---------------|---------------|---------------|---------------|---------------------|------------|-----------------------------------|
| <b>Hazard assessment</b>                 |                                  |           |                                          |             |             |             |             |             |             |               |               |               |               |               |               |               |               |               |                     |            |                                   |
| <b>A</b><br>Level 1 <sup>a</sup>         | Reference dose                   | ng/kg/d   | <i>1.68</i>                              | <b>68.8</b> | <b>1.68</b> | <i>1.68</i> | <b>3.84</b> | <i>1.68</i> | <i>1.68</i> | <i>1.68</i>   | <i>1.68</i>   | <i>1.68</i>   | <i>1.68</i>   | <i>1.68</i>   | <i>1.68</i>   | <i>1.68</i>   | <i>1.68</i>   | <i>1.68</i>   | <b>17,000</b>       |            |                                   |
| <b>B</b><br>Level 2 <sup>b</sup>         |                                  | ng/kg/d   | <i>68.8</i>                              | <b>68.8</b> | <b>1.68</b> | <i>1.68</i> | <b>3.84</b> | <i>3.84</i> | <i>3.84</i> | <i>17,000</i> | <b>17,000</b>       |            |                                   |
| <b>C</b><br>Level 3 <sup>c</sup>         |                                  | ng/kg/d   |                                          | <b>68.8</b> | <b>1.68</b> |             | <b>3.84</b> |             |             |               |               |               |               |               |               |               |               |               | <b>17,000</b>       |            |                                   |
| <b>Exposure assessment</b>               |                                  |           |                                          |             |             |             |             |             |             |               |               |               |               |               |               |               |               |               |                     |            |                                   |
| <b>D</b><br>Scenario 0                   | High milk intake <sup>d</sup>    | ng/kg/d   | Highest reported mean (World)            | 3.4         | 24.2        | 7.6         | 4.6         | 11.5        | 1.9         | 10.4          | 3.2           | 10.1          | 0.8           | 0.7           | 3.2           | 3.8           | 7.8           | 3.0           | 20.7                | 116.5      | Table S1, second last row         |
| <b>E</b><br>Scenario 1                   | High milk intake <sup>d</sup>    | ng/kg/d   | Highest reported mean (Europe)           | 1.2         | 20.7        | 7.6         | 4.0         | 11.5        | 1.9         | 2.1           | 0.8           | 3.2           | 0.8           | 0.7           | 0.8           | 3.8           | 5.9           | 1.7           | 20.0                | 86.8       | Table S1, last row                |
| <b>F</b><br>Scenario 2                   | Average milk intake <sup>d</sup> | ng/kg/d   | Medians                                  | 0.14        | 13.8        | 2.3         | 2.6         | 7.7         | 1.3         | nd            | nd            | 0.37          | nd            | nd            | 0.23          | nd            | 0.5           | nd            | 1.0                 | 29.9       | Table S1, Jakobsson et al. (2012) |
| <b>G</b><br>Scenario 3                   | Average milk intake <sup>d</sup> | ng/kg/d   | Min                                      | 0.08        | 4.6         | 1.1         | 1.1         | 3.53        | 0.64        | nd            | nd            | 0.23          | nd            | nd            | 0.23          | nd            | 0.5           | nd            | 1.0                 | 13.0       | Table S1, Jakobsson et al. (2012) |
| <b>Mixture risk assessment</b>           |                                  |           |                                          |             |             |             |             |             |             |               |               |               |               |               |               |               |               |               | <b>Hazard Index</b> |            |                                   |
| <b>Level 1, scenario 0</b><br><b>D/A</b> | Hazard quotients                 |           | high intake (world)                      | 2.01        | 0.35        | 4.52        | 2.75        | 2.99        | 1.15        | 6.16          | 1.89          | 6.0           | 0.5           | 0.41          | 1.89          | 2.26          | 4.64          | 1.77          | 0.0                 | <b>37</b>  | Table S1, second last row         |
| <b>Level 2, scenario 1</b><br><b>E/B</b> | Hazard quotients                 |           | high intake (Europe)                     | 0.02        | 0.30        | 4.52        | 2.38        | 2.99        | 0.50        | 0.54          | 0             | 0             | 0             | 0             | 0             | 0             | 0             | 0             | 0                   | <b>11</b>  | Table S1, last row                |
| <b>Level 2, scenario 2</b><br><b>F/B</b> | Hazard quotients                 |           | Average milk intake, median PBDE, Sweden | 0.002       | 0.20        | 1.37        | 1.53        | 2.0         | 0.33        | 0             | 0             | 0             | 0             | 0             | 0             | 0             | 0             | 0             | 0                   | <b>5.4</b> | Table S1, Jakobsson et al. (2012) |
| <b>Level 2, scenario 3</b><br><b>G/B</b> | Hazard quotients                 |           | Average milk intake, min PBDE, Sweden    | 0.0         | 0.07        | 0.66        | 0.63        | 0.92        | 0.17        | 0             | 0             | 0             | 0             | 0             | 0             | 0             | 0             | 0             | 0                   | <b>2.4</b> |                                   |
| <b>Level 3, scenario 1</b><br><b>E/C</b> | Hazard quotients                 |           | high intake (Europe)                     |             | 0.35        | 4.52        |             | 3.38        |             |               |               |               |               |               |               |               |               |               | 0                   | <b>8</b>   | Table S1                          |
| <b>Level 3, scenario 2</b><br><b>F/C</b> | Hazard quotients                 |           | Average milk intake, median PBDE, Sweden |             | 0.20        | 1.37        |             | 2.00        |             |               |               |               |               |               |               |               |               |               | 0                   | <b>3.6</b> | Table S1, Jakobsson et al. (2012) |
| <b>Level 3, scenario 3</b><br><b>G/C</b> | Hazard quotients                 |           | Average milk intake, min PBDE, Sweden    |             | 0.07        | 0.66        |             | 0.92        |             |               |               |               |               |               |               |               |               |               | 0                   | <b>1.6</b> |                                   |

<sup>a</sup> Congeners without reference doses (italics) are assumed to be as potent as BDE-99 (Level 1 assessment)

<sup>b</sup> Missing reference doses were bridged by a read-across of the reference dose of the nearest neighbouring congener (italics) (Level 2 assessment)

<sup>c</sup> Only congeners with EFSA reference doses were used (Level 3 assessment)

<sup>d</sup> Calculated assuming 1200 ml milk consumption per day (high intake) or 800 ml per day (average intake), 3.5% fat and a body weight of 6.1 kg (EFSA 2011, p 67), based on the PBDE levels shown in Table S1

**Table S7: Mixture risk assessment for small children (1-3 years), supplemental information to Table 2, main text**

| Parameter                        | units                                       | Statistic                                        | BDE-28                                                   | BDE-47      | BDE-99      | BDE-100     | BDE-153     | BDE-154     | BDE-183     | BDE-196       | BDE-197       | BDE-201       | BDE-202       | BDE-203       | BDE-206       | BDE-207       | BDE-208       | BDE-209       | Sum                 | Reference  |                               |                                                |
|----------------------------------|---------------------------------------------|--------------------------------------------------|----------------------------------------------------------|-------------|-------------|-------------|-------------|-------------|-------------|---------------|---------------|---------------|---------------|---------------|---------------|---------------|---------------|---------------|---------------------|------------|-------------------------------|------------------------------------------------|
| <b>Hazard assessment</b>         |                                             |                                                  |                                                          |             |             |             |             |             |             |               |               |               |               |               |               |               |               |               |                     |            |                               |                                                |
| <b>A</b><br>Level 1 <sup>a</sup> | Reference dose                              | ng/kg/d                                          | <i>1.68</i>                                              | <b>68.8</b> | <b>1.68</b> | <i>1.68</i> | <b>3.84</b> | <i>1.68</i> | <i>1.68</i> | <i>1.68</i>   | <i>1.68</i>   | <i>1.68</i>   | <i>1.68</i>   | <i>1.68</i>   | <i>1.68</i>   | <i>1.68</i>   | <i>1.68</i>   | <i>1.68</i>   | <b>17,000</b>       |            |                               |                                                |
| <b>B</b><br>Level 2 <sup>b</sup> |                                             | ng/kg/d                                          | 68.8                                                     | <b>68.8</b> | <b>1.68</b> | <i>1.68</i> | <b>3.84</b> | <i>3.84</i> | <i>3.84</i> | <i>17,000</i> | <b>17,000</b>       |            |                               |                                                |
| <b>C</b><br>Level 3 <sup>c</sup> |                                             | ng/kg/d                                          |                                                          | <b>68.8</b> | <b>1.68</b> |             | <b>3.84</b> |             |             |               |               |               |               |               |               |               |               |               | <b>17,000</b>       |            |                               |                                                |
| <b>Exposure assessment</b>       |                                             |                                                  |                                                          |             |             |             |             |             |             |               |               |               |               |               |               |               |               |               |                     |            |                               |                                                |
| <b>D</b>                         | High food consumption                       | ng/kg/d                                          | Upper bound median PBDE levels                           | 0.79        | 10.38       | 4.14        | 1.86        | 1.75        | 1.9         | 1.78          |               |               |               |               |               |               |               |               | 10.54               | 33.1       | Table S2, first row           |                                                |
| <b>E</b>                         | Average food consumption                    | ng/kg/d                                          | Upper bound median PBDE levels                           | 0.51        | 4.02        | 1.93        | 0.97        | 1.09        | 1.14        | 1.07          |               |               |               |               |               |               |               |               | 6.02                | 16.8       | Table S2, 2 <sup>nd</sup> row |                                                |
| <b>F</b>                         | Moderate exposure via food                  | ng/kg/d                                          | Lower bound median PBDE levels                           | 0.03        | 3.50        | 1.18        | 0.47        | 0.13        | 0.13        | 0.05          |               |               |               |               |               |               |               |               | 2.61                | 8.1        | Table S2, 3 <sup>rd</sup> row |                                                |
| <b>G</b>                         | High exposure via dust                      | ng/kg/d                                          | Highest mean PBDE levels from any location <sup>d</sup>  | 0.19        | 8.9         | 15.7        | 2.5         | 1.1         | 0.9         | 0.6           | 0.4           | 0.2           |               |               |               | 1.1           | 0.8           | 1.7           | 2.1                 | 40.4       | 76.5                          | Table S4, row "Level 1 – highest overall mean" |
| <b>H</b>                         | High exposure via dust                      | ng/kg/d                                          | Highest mean PBDE levels from homes, Europe <sup>d</sup> | 0.03        | 0.24        | 0.37        | 0.11        | 0.23        | 0.02        | 0.23          | 0.04          | 0.11          |               |               |               | 0.05          | 0.24          | 0.26          | 1.95                | 5.23       | 9.1                           | Table S4, row "highest mean, homes"            |
| <b>I</b>                         | Moderate exposure via dust (10 mg dust/day) | ng/kg/d                                          | Geometric mean PBDE levels, homes, Sweden <sup>e</sup>   | 0.0006      | 0.033       | 0.018       | 0.004       | 0.004       | 0.002       | 0.003         | 0             | 0.002         |               |               |               | 0.001         | 0.02          | 0.014         | 0.34                | 0.5        | 0.9                           | Table S4, Björklund et al. (2012)              |
| <b>J</b>                         | Low exposure via dust (10 mg dust/day)      | ng/kg/d                                          | Min PBDE levels, homes, Sweden <sup>e</sup>              | 0           | 0.007       | 0.002       | 0.001       | 0.001       | 0.001       | 0.001         | 0.00          | 0.001         |               |               |               | 0.001         | 0.007         | 0.006         | 0.15                | 0.16       | 0.3                           | Table S4, Björklund et al. (2012)              |
| <b>Mixture risk assessment</b>   |                                             |                                                  |                                                          |             |             |             |             |             |             |               |               |               |               |               |               |               |               |               | <b>Hazard Index</b> |            |                               |                                                |
| <b>(D+G)/A</b><br>Level 1        | Hazard quotients                            | High exposure via food and dust, scenario 1      | 0.58                                                     | 0.28        | 11.8        | 2.6         | 0.75        | 1.65        | 1.43        | 0.22          | 0.09          |               |               |               | 0.42          | 0.46          | 1.01          | 1.26          | 0                   | <b>23</b>  |                               |                                                |
| <b>(D+H)/B</b><br>Level 2        | Hazard quotients                            | High exposure via food and dust (EU), scenario 1 | 0.01                                                     | 0.15        | 2.69        | 1.17        | 0.52        | 0.50        | 0.52        |               | 0             |               |               | 0             | 0             | 0             | 0             | 0             | 0.001               | <b>5.6</b> |                               |                                                |
| <b>(E+I)/B</b><br>Level 2        | Hazard quotients                            | Moderate exposure via food and dust, scenario 2  | 0.01                                                     | 0.06        | 1.16        | 0.58        | 0.28        | 0.30        | 0.28        |               | 0             |               |               | 0             | 0             | 0             | 0             | 0             | 0                   | <b>2.7</b> |                               |                                                |
| <b>(F+J)/B</b><br>Level 2        | Hazard quotients                            | Moderate exposure via food, low dust, scenario 3 | 0                                                        | 0.05        | 0.70        | 0.28        | 0.03        | 0.03        | 0.01        |               | 0             |               |               | 0             | 0             | 0             | 0             | 0             | 0                   | <b>1.1</b> |                               |                                                |
| <b>(D+H)/C</b><br>Level 3        | Hazard quotients                            | High exposure via food and dust (EU), scenario 1 |                                                          | 0.15        | 2.69        |             | 0.52        |             |             |               |               |               |               |               |               |               |               |               | 0.001               | <b>3.4</b> |                               |                                                |
| <b>(E+I)/C</b><br>Level 3        | Hazard quotients                            | Moderate exposure via food and dust, scenario 2  |                                                          | 0.06        | 1.16        |             | 0.28        |             |             |               |               |               |               |               |               |               |               |               | 0                   | <b>1.5</b> |                               |                                                |
| <b>(F+J)/C</b><br>Level 3        | Hazard quotients                            | Moderate exposure via food, low dust, scenario 3 |                                                          | 0.05        | 0.70        |             | 0.03        |             |             |               |               |               |               |               |               |               |               |               | 0                   | <b>0.8</b> |                               |                                                |

<sup>a</sup> Congeners without reference doses (italics) are assumed to be as potent as BDE-99 (Level 1 assessment)

<sup>b</sup> Missing reference doses were bridged by a read-across of the reference dose of the nearest neighbouring congener (italics) (Level 2 assessment)

<sup>c</sup> Only congeners with EFSA reference doses were used (Level 3 assessment)

<sup>d</sup> Calculated assuming dust intake of 57 mg/day (95<sup>th</sup> percentile, Trudel et al. 2011) and a body weight of 12 kg (EFSA 2011).

<sup>e</sup> Calculated assuming dust intake of 10 mg/day (between 50<sup>th</sup> percentile, 1.7 mg dust/day, and 95<sup>th</sup> percentile, 57 mg dust/day, Trudel et al. 2011) and a body weight of 12 kg (US EPA 2011).

**Table S8: Mixture risk assessment for adults, supplemental information to Table 2, main text**

| Parameter                        | units                        | Statistic                                                 | BDE-28                                                   | BDE-47      | BDE-99      | BDE-100     | BDE-153     | BDE-154     | BDE-183     | BDE-196       | BDE-197       | BDE-201       | BDE-202       | BDE-203       | BDE-206       | BDE-207       | BDE-208       | BDE-209       | Sum                 | Reference                                      |                               |
|----------------------------------|------------------------------|-----------------------------------------------------------|----------------------------------------------------------|-------------|-------------|-------------|-------------|-------------|-------------|---------------|---------------|---------------|---------------|---------------|---------------|---------------|---------------|---------------|---------------------|------------------------------------------------|-------------------------------|
| <b>Hazard assessment</b>         |                              |                                                           |                                                          |             |             |             |             |             |             |               |               |               |               |               |               |               |               |               |                     |                                                |                               |
| <b>A</b><br>Level 1 <sup>a</sup> | Reference dose               | ng/kg/d                                                   | <i>1.68</i>                                              | <b>68.8</b> | <b>1.68</b> | <i>1.68</i> | <b>3.84</b> | <i>1.68</i> | <i>1.68</i> | <i>1.68</i>   | <i>1.68</i>   | <i>1.68</i>   | <i>1.68</i>   | <i>1.68</i>   | <i>1.68</i>   | <i>1.68</i>   | <i>1.68</i>   | <i>1.68</i>   | <b>17,000</b>       |                                                |                               |
| <b>B</b><br>Level 2 <sup>b</sup> |                              | ng/kg/d                                                   | <i>68.8</i>                                              | <b>68.8</b> | <b>1.68</b> | <i>1.68</i> | <b>3.84</b> | <i>3.84</i> | <i>3.84</i> | <i>17,000</i> | <b>17,000</b>       |                                                |                               |
| <b>C</b><br>Level 3 <sup>c</sup> |                              | ng/kg/d                                                   |                                                          | <b>68.8</b> | <b>1.68</b> |             | <b>3.84</b> |             |             |               |               |               |               |               |               |               |               |               | <b>17,000</b>       |                                                |                               |
| <b>Exposure assessment</b>       |                              |                                                           |                                                          |             |             |             |             |             |             |               |               |               |               |               |               |               |               |               |                     |                                                |                               |
| <b>D</b>                         | High food consumption        | ng/kg/d                                                   | Upper bound median PBDE levels                           | 0.29        | 1.97        | 0.67        | 0.64        | 0.48        | 0.53        | 0.42          |               |               |               |               |               |               |               |               | 3.02                | 8.0                                            | Table S3, first row           |
| <b>E</b>                         | Additional exposure via fish | ng/kg/d                                                   | Upper bound mean PBDE levels                             | 0.23        | 5.36        | 0.75        | 2.07        | 0.47        | 0.59        | 0.58          |               |               |               |               |               |               |               |               | 1.77                | 11.8                                           | Table S3, 2 <sup>nd</sup> row |
| <b>F</b>                         | Average food consumption     | ng/kg/d                                                   | Upper bound median PBDE levels                           | 0.17        | 0.72        | 0.35        | 0.30        | 0.26        | 0.28        | 0.23          |               |               |               |               |               |               |               |               | 1.69                | 4.0                                            | Table S3, 3 <sup>rd</sup> row |
| <b>G</b>                         | High exposure via dust       | ng/kg/d                                                   | Highest mean PBDE levels from any location <sup>d</sup>  | 0.05        | 2.6         | 4.6         | 0.73        | 0.32        | 0.25        | 0.18          | 0.11          | 0.04          |               | 0.33          | 0.23          | 0.49          | 0.62          | 11.8          | 22.3                | Table S4, row "Level 1 – highest overall mean" |                               |
| <b>H</b>                         | Moderate exposure via dust   | ng/kg/d                                                   | Highest mean PBDE levels from homes, Europe <sup>e</sup> | 0.004       | 0.037       | 0.056       | 0.017       | 0.034       | 0.003       | 0.034         | 0.006         | 0.017         |               | 0.007         | 0.036         | 0.038         | 0.293         | 0.79          | 1.4                 | Table S4, row "highest mean, homes"            |                               |
| <b>Mixture risk assessment</b>   |                              |                                                           |                                                          |             |             |             |             |             |             |               |               |               |               |               |               |               |               |               | <b>Hazard Index</b> |                                                |                               |
| <b>(D+E+G)/A</b><br>Level 1      | Hazard quotients             | High exposure via food, fish and dust, scenario 1         | 0.34                                                     | 0.14        | 3.58        | 2.05        | 0.33        | 0.82        | 0.70        | 0.06          | 0.03          |               |               | 0.20          | 0.14          | 0.29          | 0.37          | 0.001         | <b>9.0</b>          |                                                |                               |
| <b>(D+E+G)/B</b><br>Level 2      | Hazard quotients             | High exposure via food, fish and dust, scenario 1         | 0.01                                                     | 0.14        | 3.58        | 2.05        | 0.33        | 0.36        | 0.31        | 0             | 0             |               |               | 0             | 0             | 0             | 0             | 0.001         | <b>6.8</b>          |                                                |                               |
| <b>(E+F+H)/B</b><br>Level 2      | Hazard quotients             | Exposure via fish, moderate via food and dust, scenario 2 | 0.006                                                    | 0.09        | 0.69        | 1.42        | 0.20        | 0.23        | 0.22        | 0             | 0             |               |               | 0             | 0             | 0             | 0             | 0.0           | <b>2.8</b>          |                                                |                               |
| <b>(D+H)/B</b><br>Level 2        | Hazard quotients             | High exposure via food, moderate dust, scenario 3         | 0.004                                                    | 0.03        | 0.43        | 0.39        | 0.13        | 0.14        | 0.12        | 0             | 0             |               |               | 0             | 0             | 0             | 0             | 0.0002        | <b>1.25</b>         |                                                |                               |
| <b>(F+H)/B</b><br>Level 2        | Hazard quotients             | Moderate exposure via food, moderate dust, scenario 4     | 0.003                                                    | 0.01        | 0.24        | 0.19        | 0.07        | 0.07        | 0.07        | 0             | 0             |               |               | 0             | 0             | 0             | 0             | 0.0001        | <b>0.66</b>         |                                                |                               |
| <b>(D+E+H)/C</b><br>Level 3      | Hazard quotients             | High exposure via food, fish and dust, scenario 1         |                                                          | 0.14        | 3.58        |             | 0.33        |             |             |               |               |               |               |               |               |               |               | 0.001         | <b>4.0</b>          |                                                |                               |
| <b>(E+F+H)/C</b><br>Level 3      | Hazard quotients             | Exposure via fish, moderate via food and dust, scenario 2 |                                                          | 0.09        | 0.69        |             | 0.20        |             |             |               |               |               |               |               |               |               |               | 0.0           | <b>0.98</b>         |                                                |                               |
| <b>(D+H)/C</b><br>Level 3        | Hazard quotients             | High exposure via food, moderate dust, scenario 3         |                                                          | 0.03        | 0.43        |             | 0.13        |             |             |               |               |               |               |               |               |               |               | 0.0002        | <b>0.6</b>          |                                                |                               |
| <b>(F+H)/C</b><br>Level 3        | Hazard quotients             | Moderate exposure via food, moderate dust, scenario 4     |                                                          | 0.01        | 0.24        |             | 0.07        |             |             |               |               |               |               |               |               |               |               | 0.0001        | <b>0.33</b>         |                                                |                               |

<sup>a</sup> Congeners without reference doses (italics) are assumed to be as potent as BDE-99 (Level 1 assessment)

<sup>b</sup> Missing reference doses were bridged by a read-across of the reference dose of the nearest neighbouring congener (italics) (Level 2 assessment)

<sup>c</sup> Only congeners with EFSA reference doses were used (Level 3 assessment)

<sup>d</sup> Calculated assuming dust intake of 96 mg/day (95<sup>th</sup> percentile, Trudel et al. 2011) and a body weight of 70 kg (US EPA 2011).

<sup>e</sup> Calculated assuming dust intake of 50 mg/day (US EPA 2011) and a body weight of 70 kg (US EPA 2011).

**Table S9: Mixture risk assessment for fetuses (supplemental information to Table 3 of main text)**

| Parameter                        | units                                                      | Statistic | Value                                    | BDE-28         | BDE-47         | BDE-99       | BDE-100      | BDE-153       | BDE-154       | BDE-183       | BDE-197        | BDE-209        | Sum                 | Reference    |                         |
|----------------------------------|------------------------------------------------------------|-----------|------------------------------------------|----------------|----------------|--------------|--------------|---------------|---------------|---------------|----------------|----------------|---------------------|--------------|-------------------------|
| <b>A</b>                         | Critical body burden <sup>a</sup>                          | ng/kg bw  |                                          | <i>9,000</i>   | <b>232,000</b> | <b>9,000</b> | <i>9,000</i> | <b>62,000</b> | <i>9,000</i>  | <i>9,000</i>  | <i>9,000</i>   | <b>425,000</b> |                     | EFSA (2011)  |                         |
| <b>B</b>                         | Critical body burden <sup>a</sup>                          | ng/kg bw  |                                          | <i>232,000</i> | <b>232,000</b> | <b>9,000</b> | <i>9,000</i> | <b>62,000</b> | <i>62,000</i> | <i>62,000</i> | <i>425,000</i> | <b>425,000</b> |                     | EFSA (2011)  |                         |
| <b>Estimation of body burden</b> |                                                            |           |                                          |                |                |              |              |               |               |               |                |                |                     |              |                         |
| b                                | Measured concentration in aborted Chinese fetuses          | ng/g lw   | mean                                     |                | 0.38           | 0.62         | 0.20         | 0.07          | 0.62          | 0.05          | 0.20           | 0.77           | 1.55                | 4.46         | Zhao et al. (2013)      |
| c                                |                                                            |           | max                                      |                | 1.17           | 1.85         | 0.87         | 0.46          | 3.71          | 0.34          | 0.81           | 4.59           | 6.68                | 20.48        |                         |
| d                                | Body fat                                                   | %         | mean                                     | 1.07           |                |              |              |               |               |               |                |                |                     |              |                         |
| <b>E = b*d</b>                   | <b>Fetal body burden</b>                                   | ng/kg bw  | mean                                     |                | 4.1            | 6.6          | 2.1          | 0.7           | 6.6           | 0.5           | 2.1            | 8.2            | 16.6                | 47.7         |                         |
| <b>F = c*d</b>                   |                                                            |           | max                                      |                | 12.5           | 19.8         | 9.3          | 4.9           | 39.7          | 3.6           | 8.7            | 49.1           | 71.5                | 219.1        |                         |
| g                                | Measured concentration in livers (US fetuses and newborns) | ng/g lw   | mean                                     |                | 0.6            | 10.7         | 4.5          | 1.9           | 1.1           | 0.3           | 0.3            |                | 3.5                 | 23           | Schechter et al. (2007) |
| h                                | Body fat                                                   | %         | median                                   | 9.2            |                |              |              |               |               |               |                |                |                     |              | Hawkes et al. (2011)    |
| i                                |                                                            |           | 95 <sup>th</sup> percentile              | 14.4           |                |              |              |               |               |               |                |                |                     |              |                         |
| <b>J = g*h</b>                   | <b>Fetal body burden</b>                                   | ng/kg bw  | Median <sup>b</sup>                      |                | 55.2           | 984.4        | 414          | 174.8         | 101.2         | 27.6          | 27.6           |                | 322                 | 2107         | Schechter et al. (2007) |
| <b>K = g*i</b>                   |                                                            |           | 95 <sup>th</sup> percentile <sup>c</sup> |                | 86.4           | 1540.8       | 648          | 273.6         | 158.4         | 43.2          | 43.2           |                | 504                 | 3298         |                         |
| <b>Mixture risk assessment</b>   |                                                            |           |                                          |                |                |              |              |               |               |               |                |                | <b>Hazard Index</b> |              |                         |
| x                                | Assessment factor                                          |           |                                          | 2.5            |                |              |              |               |               |               |                |                |                     |              |                         |
| <b>F*x/A</b>                     | Hazard quotients, Level 1 MRA                              |           | Max <sup>d</sup>                         |                | 0.003          | 0.0002       | 0.003        | 0.001         | 0.002         | 0.001         | 0.002          | 0.014          | 0.0004              | <b>0.027</b> | Zhao et al. (2013)      |
| <b>E*x/B</b>                     | Hazard quotients                                           |           | Mean <sup>e</sup>                        |                | 0.00004        | 0.00007      | 0.00059      | 0.00021       | 0.00027       | 0.00002       | 0.00009        | 0.00005        | 0.0001              | <b>0.001</b> |                         |
| <b>F*x/B</b>                     | Hazard quotients, Level 2 MRA                              |           | Max <sup>d</sup>                         |                | 0.0001         | 0.0002       | 0.0026       | 0.0014        | 0.0016        | 0.0001        | 0.0003         | 0.0003         | 0.0004              | <b>0.007</b> |                         |
| <b>J*x/B</b>                     | Hazard quotients                                           |           | Median <sup>b</sup>                      |                | 0.0006         | 0.0106       | 0.115        | 0.0486        | 0.0041        | 0.0011        | 0.0011         |                | 0.0019              | <b>0.18</b>  | Schechter et al. (2007) |
| <b>K*x/B</b>                     | Hazard quotients, Level 2 MRA                              |           | 95 <sup>th</sup> percentile <sup>c</sup> |                | 0.0009         | 0.0166       | 0.180        | 0.0760        | 0.0064        | 0.0064        | 0.0017         |                | 0.0030              | <b>0.29</b>  |                         |

<sup>a</sup> The PBDE body burden in rodents at a dose equivalent to the BMDL<sub>10</sub>, from EFSA (2011), p 157, Table 40. Values in italics are read-across from the values in bold that were derived from available experimental data; see Level 2 procedure in Material and Methods (Bridging assumption made in the hazard assessment component of MRA), main text.

<sup>b</sup> Calculated assuming median body fat proportion according to Hawkes et al. (2011)

<sup>c</sup> Calculated assuming the 95th percentile of body fat proportion according to Hawkes et al. (2011)

<sup>d</sup> Calculated using maximum fetal PBDE levels, Zhao et al. (2013)

<sup>e</sup> Calculated using mean fetal PBDE levels, Zhao et al. (2013)

**Table S10: Level 2 mixture risk assessment for small children based on body burdens estimated from PBDE serum levels (supplemental information to Table 3 of main text)**

| Parameter                        | units                             | Statistic | Value                       | BDE-28         | BDE-47         | BDE-99       | BDE-100      | BDE-153       | BDE-154       | BDE-183       | BDE-196        | BDE-197        | BDE-203        | BDE-206        | BDE-207        | BDE-208        | BDE-209        | Sum                 | Reference               |
|----------------------------------|-----------------------------------|-----------|-----------------------------|----------------|----------------|--------------|--------------|---------------|---------------|---------------|----------------|----------------|----------------|----------------|----------------|----------------|----------------|---------------------|-------------------------|
| <b>A</b>                         | Critical body burden <sup>a</sup> | ng/kg bw  |                             | <i>232,000</i> | <b>232,000</b> | <b>9,000</b> | <i>9,000</i> | <b>62,000</b> | <i>62,000</i> | <i>62,000</i> | <i>425,000</i> | <b>425,000</b>      | EFSA (2011)             |
| <b>Estimation of body burden</b> |                                   |           |                             |                |                |              |              |               |               |               |                |                |                |                |                |                |                |                     |                         |
| b                                | Serum levels <sup>b</sup>         | ng/g lw   | median                      | 0.057          | 1.3            | 0.22         | 0.28         | 1.2           | nd            | nd            | 0.088          | 0.42           | 0.81           | 0.28           | 0.48           | 0.13           | 1.5            |                     | Sahlstrom et al. (2014) |
| c                                |                                   |           | max                         | 0.61           | 5.6            | 2.8          | 2.6          | 17            | nd            | nd            | 1.2            | 6.5            | 8.8            | 2.8            | 13             | 2.0            | 45             |                     |                         |
| d                                | Body fat                          | %         | mean                        | 29             |                |              |              |               |               |               |                |                |                |                |                |                |                |                     |                         |
| <b>E = b*d</b>                   | <b>Body burden</b>                | ng/kg bw  | median                      | 16.5           | 377            | 64           | 81           | 348           |               |               | 25.5           | 122            | 235            | 81             | 139            | 38             | 435            |                     |                         |
| <b>F = c*d</b>                   | <b>Body burden</b>                | bw        | max                         | 177            | 1624           | 812          | 754          | 4930          |               |               | 348            | 1885           | 2552           | 812            | 3770           | 580            | 13050          |                     |                         |
| g                                | Serum levels <sup>b</sup>         | ng/g lw   | median                      | 1.0            | 31             | 6.2          | 6.2          | 13            | 3.2           | nd            | nd             | 0.5            | nd             | nd             | nd             | nd             | 1.7            |                     | Lunder et al. (2010)    |
| h                                |                                   |           | max                         | 2.2            | 65             | 15           | 14           | 32            | 38            | 1.7           | nd             | 2.0            | nd             | nd             | nd             | nd             | 19             |                     |                         |
| i                                | Body fat                          | %         | mean                        | 29             |                |              |              |               |               |               |                |                |                |                |                |                |                |                     |                         |
| <b>J = g*i</b>                   | <b>Body burden</b>                | ng/kg bw  | median                      | 290            | 8990           | 1798         | 1798         | 3770          | 928           |               |                | 142            |                |                |                |                | 493            |                     |                         |
| <b>K = h*i</b>                   | <b>Body burden</b>                | bw        | max                         | 638            | 18850          | 4350         | 4060         | 9280          | 11020         | 493           |                | 580            |                |                |                |                | 5510           |                     |                         |
| l                                | Serum levels <sup>c</sup>         | ng/g lw   | Geometric mean              | 2.3            | 62             | 13           | 12.7         | 16            | 1.1           | 0.2           | nd             | nd             | nd             | nd             | nd             | nd             | 2.8            |                     | Wu et al. (2015)        |
| m                                |                                   |           | 95 <sup>th</sup> percentile | 11.6           | 364            | 78           | 64           | 87            | 5.3           | 0.8           | nd             | nd             | nd             | nd             | nd             | nd             | 9.6            |                     |                         |
| n                                | Body fat                          | %         | mean                        | 29             |                |              |              |               |               |               |                |                |                |                |                |                |                |                     |                         |
| <b>R = l*n</b>                   | <b>Body burden</b>                | ng/kg bw  | Geometric mean              | 653            | 17922          | 3770         | 3683         | 4669          | 322           | 58            |                |                |                |                |                |                | 800            |                     |                         |
| <b>S = m*n</b>                   | <b>Body burden</b>                | bw        | 95 <sup>th</sup> percentile | 3364           | 105560         | 22591        | 18560        | 25143         | 1537          | 232           |                |                |                |                |                |                | 2784           |                     |                         |
| <b>Mixture risk assessment</b>   |                                   |           |                             |                |                |              |              |               |               |               |                |                |                |                |                |                |                | <b>Hazard Index</b> |                         |
| x                                | Assessment factor                 |           |                             | 2.5            |                |              |              |               |               |               |                |                |                |                |                |                |                |                     |                         |
| <b>E*x/A</b>                     | Hazard quotients                  |           | median                      | 0.0002         | 0.004          | 0.018        | 0.023        | 0.014         |               |               | 0.0001         | 0.0007         | 0.0014         | 0.0005         | 0.0008         | 0.0002         | 0.0026         | <b>0.1</b>          | Sahlstrom et al. (2014) |
| <b>F*x/A</b>                     | Hazard quotients                  |           | max                         | 0.002          | 0.0175         | 0.226        | 0.209        | 0.199         |               |               | 0.002          | 0.011          | 0.015          | 0.0047         | 0.022          | 0.003          | 0.076          | <b>0.8</b>          |                         |
| <b>J*x/A</b>                     | Hazard quotients                  |           | median                      | 0.003          | 0.097          | 0.499        | 0.499        | 0.152         | 0.037         |               |                | 0.0008         |                |                |                |                | 0.0029         | <b>1.3</b>          | Lunder et al. (2010)    |
| <b>K*x/A</b>                     | Hazard quotients                  |           | max                         | 0.007          | 0.203          | 1.208        | 1.128        | 0.374         | 0.444         | 0.02          |                | 0.0034         |                |                |                |                | 0.0324         | <b>3.4</b>          |                         |
| <b>R*x/A</b>                     | Hazard quotients                  |           | Geometric mean              | 0.007          | 0.193          | 1.047        | 1.023        | 0.1883        | 0.013         | 0.002         |                |                |                |                |                |                | 0.005          | <b>2.5</b>          | Wu et al. (2015)        |
| <b>S*x/A</b>                     | Hazard quotients                  |           | 95 <sup>th</sup> percentile | 0.036          | 1.137          | 6.275        | 5.156        | 1.0138        | 0.062         | 0.0093        |                |                |                |                |                |                | 0.0164         | <b>13.7</b>         |                         |

<sup>a</sup> The PBDE body burden in rodents at a dose equivalent to the BMDL<sub>10</sub>, from EFSA (2011), p 157, Table 40. Values in italics are read-across from the values in bold that were derived from available experimental data; see Level 2 procedure in Material and Methods (Bridging assumption made in the hazard assessment component of MRA), main text.

<sup>b</sup> for children 1-4 years of age

<sup>c</sup> for children 2-8 years of age

**Table S11: Level 3 mixture risk assessment for small children based on body burdens estimated from PBDE serum levels (supplemental information to Table 3 of main text)**

| Parameter                        | units                             | Statistic | Value                                         | BDE-47          | BDE-99         | BDE-153          | BDE-209          | Sum                        | Reference               |
|----------------------------------|-----------------------------------|-----------|-----------------------------------------------|-----------------|----------------|------------------|------------------|----------------------------|-------------------------|
| <b>A</b>                         | Critical body burden <sup>a</sup> | ng/kg bw  |                                               | <b>232,000</b>  | <b>9,000</b>   | <b>62,000</b>    | <b>425,000</b>   |                            | EFSA (2011)             |
| <b>Estimation of body burden</b> |                                   |           |                                               |                 |                |                  |                  |                            |                         |
| b                                | Serum levels <sup>b</sup>         | ng/g lw   | median                                        | 1.3             | 0.22           | 1.2              | 1.5              |                            | Sahlstrom et al. (2014) |
| c                                |                                   |           | max                                           | 5.6             | 2.8            | 17               | 45               |                            |                         |
| d                                | Body fat                          | %         | mean                                          | 29              |                |                  |                  |                            |                         |
| <b>E = b*d</b><br><b>F = c*d</b> | <b>Body burden</b>                | ng/kg bw  | median<br>max                                 | 377<br>1624     | 64<br>812      | 348<br>4930      | 435<br>13050     |                            |                         |
| g                                | Serum levels <sup>b</sup>         | ng/g lw   | median                                        | 31              | 6.2            | 13               | 1.7              |                            | Lunder et al. (2010)    |
| h                                |                                   |           | max                                           | 65              | 15             | 32               | 19               |                            |                         |
| i                                | Body fat                          | %         | mean                                          | 29              |                |                  |                  |                            |                         |
| <b>J = g*i</b><br><b>K = h*i</b> | <b>Body burden</b>                | ng/kg bw  | median<br>max                                 | 8990<br>18850   | 1798<br>4350   | 3770<br>9280     | 493<br>5510      |                            |                         |
| l                                | Serum levels <sup>c</sup>         | ng/g lw   | Geometric mean                                | 62              | 13             | 16               | 2.8              |                            | Wu et al. (2015)        |
| m                                |                                   |           | 95 <sup>th</sup> percentile                   | 364             | 78             | 87               | 9.6              |                            |                         |
| n                                | Body fat                          | %         | mean                                          | 29              |                |                  |                  |                            |                         |
| <b>R = l*n</b><br><b>S = m*n</b> | <b>Body burden</b>                | ng/kg bw  | Geometric mean<br>95 <sup>th</sup> percentile | 17922<br>105560 | 3770<br>22591  | 4669<br>25143    | 800<br>2784      |                            |                         |
| <b>Mixture risk assessment</b>   |                                   |           |                                               |                 |                |                  |                  |                            |                         |
| x                                | Assessment factor                 |           |                                               | 2.5             |                |                  |                  |                            | <b>Hazard Index</b>     |
| <b>E*x/A</b><br><b>F*x/A</b>     | Hazard quotients                  |           | median<br>max                                 | 0.004<br>0.0175 | 0.018<br>0.226 | 0.014<br>0.199   | 0.0026<br>0.076  | <b>0.038</b><br><b>0.5</b> | Sahlstrom et al. (2014) |
| <b>J*x/A</b><br><b>K*x/A</b>     | Hazard quotients                  |           | median<br>max                                 | 0.097<br>0.203  | 0.499<br>1.208 | 0.152<br>0.374   | 0.0029<br>0.0324 | <b>0.8</b><br><b>1.8</b>   | Lunder et al. (2010)    |
| <b>R*x/A</b><br><b>S*x/A</b>     | Hazard quotients                  |           | Geometric mean<br>95 <sup>th</sup> percentile | 0.193<br>1.137  | 1.047<br>6.275 | 0.1883<br>1.0138 | 0.005<br>0.0164  | <b>1.4</b><br><b>8.4</b>   | Wu et al. (2015)        |

<sup>a</sup>The PBDE body burden in rodents at a dose equivalent to the BMDL<sub>10</sub>, from EFSA (2011), p 157, Table 40. Values in italics are read-across from the values in bold that were derived from available experimental data; see Level 2 procedure in Material and Methods (Bridging assumption made in the hazard assessment component of MRA), main text.

<sup>b</sup> for children 1-4 years of age

<sup>c</sup> for children 2-8 years of age



**Table S12: Level 2 mixture risk assessment for adults based on body burdens estimated from PBDE serum levels (supplemental information to Table 3 of main text) - France**

| Parameter                        | units                             | Statistic | Value | BDE-28         | BDE-47         | BDE-99       | BDE-100      | BDE-153       | BDE-154       | BDE-183       | BDE-196        | BDE-197        | BDE-203        | BDE-206        | BDE-207        | BDE-208        | BDE-209        | Sum                 | Reference              |
|----------------------------------|-----------------------------------|-----------|-------|----------------|----------------|--------------|--------------|---------------|---------------|---------------|----------------|----------------|----------------|----------------|----------------|----------------|----------------|---------------------|------------------------|
| <b>A</b>                         | Critical body burden <sup>a</sup> | ng/kg bw  |       | <i>232,000</i> | <b>232,000</b> | <b>9,000</b> | <i>9,000</i> | <b>62,000</b> | <i>62,000</i> | <i>62,000</i> | <i>425,000</i> | <b>425,000</b>      | EFSA (2011)            |
| <b>Estimation of body burden</b> |                                   |           |       |                |                |              |              |               |               |               |                |                |                |                |                |                |                |                     |                        |
| b                                | Serum levels                      | ng/g lw   | mean  | 0.15           | 2.81           | 3.59         | 0.70         | 0.89          | 0.14          | 0.25          | 0.32           | 1.06           | 0.23           | 1.96           | 2.55           | 0.86           | 0.47           |                     | Antignac et al. (2009) |
| c                                |                                   |           | max   | 0.39           | 4.84           | 18.02        | 4.19         | 9.66          | 0.94          | 2.16          | 0.98           | 5.04           | 0.83           | 10.08          | 10.55          | 7.07           | 37.43          |                     |                        |
| d                                | Body fat                          | %         | mean  | 29             |                |              |              |               |               |               |                |                |                |                |                |                |                |                     |                        |
| <b>E=b*d</b>                     | <b>Body</b>                       | ng/kg     | mean  | 43.5           | 815            | 1041         | 203          | 258           | 41            | 73            | 93             | 307            | 67             | 568            | 740            | 249            | 136            |                     |                        |
| <b>F=c*d</b>                     | <b>burden</b>                     | bw        | max   | 113            | 1404           | 5226         | 1215         | 2801          | 273           | 626           | 284            | 1461           | 241            | 2923           | 3060           | 2050           | 10855          |                     |                        |
| <b>Mixture risk assessment</b>   |                                   |           |       |                |                |              |              |               |               |               |                |                |                |                |                |                |                | <b>Hazard Index</b> |                        |
| x                                | Assessment factor                 |           |       | 2.5            |                |              |              |               |               |               |                |                |                |                |                |                |                |                     |                        |
| <b>E*x/A</b>                     | Hazard                            |           | mean  | 0.0005         | 0.009          | 0.289        | 0.056        | 0.01          | 0.002         | 0.003         | 0.0006         | 0.002          | 0.0004         | 0.003          | 0.004          | 0.002          | 0.0008         | <b>0.38</b>         |                        |
| <b>F*x/A</b>                     | quotients                         |           | max   | 0.001          | 0.015          | 1.45         | 0.34         | 0.11          | 0.011         | 0.025         | 0.002          | 0.009          | 0.001          | 0.017          | 0.018          | 0.012          | 0.064          | <b>2.07</b>         |                        |

<sup>a</sup> The PBDE body burden in rodents at a dose equivalent to the BMDL<sub>10</sub>, from EFSA (2011), p 157, Table 40. Values in italics are read-across from the values in bold that were derived from available experimental data; see Level 2 procedure in Material and Methods (Bridging assumption made in the hazard assessment component of MRA), main text.

**Table S13: Level 3 mixture risk assessment for adults based on body burdens estimated from PBDE serum levels (supplemental information to Table 3 of main text) - France**

| Parameter                      | units                             | Statistic | Value | BDE-47         | BDE-99       | BDE-153       | BDE-209        | Sum                 | Reference              |
|--------------------------------|-----------------------------------|-----------|-------|----------------|--------------|---------------|----------------|---------------------|------------------------|
| <b>A</b>                       | Critical body burden <sup>a</sup> | ng/kg bw  |       | <i>232,000</i> | <b>9,000</b> | <b>62,000</b> | <i>425,000</i> |                     | EFSA (2011)            |
| b                              | Serum levels                      | ng/g lw   | mean  | 2.81           | 3.59         | 0.89          | 0.47           |                     | Antignac et al. (2009) |
| c                              |                                   |           | max   | 4.84           | 18.02        | 9.66          | 37.43          |                     |                        |
| d                              | Body fat                          | %         | mean  | 29             |              |               |                |                     |                        |
| <b>E=b*d</b>                   | <b>Body</b>                       | ng/kg     | mean  | 815            | 1041         | 258           | 136            |                     |                        |
| <b>F=c*d</b>                   | <b>burden</b>                     | bw        | max   | 1404           | 5226         | 2801          | 10855          |                     |                        |
| <b>Mixture risk assessment</b> |                                   |           |       |                |              |               |                | <b>Hazard Index</b> |                        |
| x                              | Assessment factor                 |           |       |                |              |               |                |                     |                        |
| <b>E*x/A</b>                   | Hazard                            |           | mean  | 0.009          | 0.289        | 0.01          | 0.0008         | <b>0.31</b>         |                        |
| <b>F*x/A</b>                   | quotients                         |           | max   | 0.015          | 1.45         | 0.11          | 0.064          | <b>1.64</b>         |                        |

<sup>a</sup> The PBDE body burden in rodents at a dose equivalent to the BMDL<sub>10</sub>, from EFSA (2011), p 157, Table 40. Values in italics are read-across from the values in bold that were derived from available experimental data; see Level 2 procedure in Material and Methods (Bridging assumption made in the hazard assessment component of MRA), main text.

**Table S14: Level 2 mixture risk assessment for adults based on body burdens estimated from PBDE serum levels (supplemental information to Table 3 of main text) - USA**

| Parameter                        | units                             | Statistic | Value | BDE-28         | BDE-47         | BDE-99       | BDE-100      | BDE-153       | BDE-154       | BDE-183       | BDE-196        | BDE-197        | BDE-203        | BDE-206        | BDE-207        | BDE-208        | BDE-209        | Sum                 | Reference            |
|----------------------------------|-----------------------------------|-----------|-------|----------------|----------------|--------------|--------------|---------------|---------------|---------------|----------------|----------------|----------------|----------------|----------------|----------------|----------------|---------------------|----------------------|
| <b>A</b>                         | Critical body burden <sup>a</sup> | ng/kg bw  |       | <i>232,000</i> | <b>232,000</b> | <b>9,000</b> | <i>9,000</i> | <b>62,000</b> | <i>62,000</i> | <i>62,000</i> | <i>425,000</i> | <i>425,000</i> | <i>425,000</i> | <i>425,000</i> | <i>425,000</i> | <i>425,000</i> | <b>425,000</b> |                     | EFSA (2011)          |
| <b>Estimation of body burden</b> |                                   |           |       |                |                |              |              |               |               |               |                |                |                |                |                |                |                |                     |                      |
| b                                | Serum levels                      | ng/g lw   | mean  | 0.72           | 12.0           | 1.7          | 1.8          | 7.6           |               | 0             |                | 0.3            |                |                |                |                | 1.7            |                     | Lunder et al. (2010) |
| c                                |                                   |           | max   | 2.50           | 40.0           | 5.2          | 7.0          | 32.0          |               | 0.5           |                | 0.8            |                |                |                |                | 3.2            |                     |                      |
| d                                | Body fat                          | %         | mean  | 29             |                |              |              |               |               |               |                |                |                |                |                |                |                |                     |                      |
| <b>E=b*d</b>                     | <b>Body</b>                       | ng/kg     | mean  | 209            | 3480           | 493          | 522          | 2204          |               | 0             |                | 96             |                |                |                |                | 493            |                     |                      |
| <b>F=c*d</b>                     | <b>burden</b>                     | bw        | max   | 725            | 11600          | 1508         | 2030         | 9280          |               | 145           |                | 238            |                |                |                |                | 928            |                     |                      |
| <b>Mixture risk assessment</b>   |                                   |           |       |                |                |              |              |               |               |               |                |                |                |                |                |                |                | <b>Hazard Index</b> |                      |
| x                                | Assessment factor                 |           |       | 2.5            |                |              |              |               |               |               |                |                |                |                |                |                |                |                     |                      |
| <b>E*x/A</b>                     | Hazard                            |           | mean  | 0.0023         | 0.038          | 0.137        | 0.145        | 0.089         |               | 0             |                | 0.0006         |                |                |                |                | 0.003          |                     | <b>0.41</b>          |
| <b>F*x/A</b>                     | quotients                         |           | max   | 0.008          | 0.125          | 0.42         | 0.56         | 0.37          |               | 0.006         |                | 0.001          |                |                |                |                | 0.005          |                     | <b>1.5</b>           |

<sup>a</sup> The PBDE body burden in rodents at a dose equivalent to the BMDL<sub>10</sub>, from EFSA (2011), p 157, Table 40. Values in italics are read-across from the values in bold that were derived from available experimental data; see Level 2 procedure in Material and Methods (Bridging assumption made in the hazard assessment component of MRA), main text.

**Table S15: Level 3 mixture risk assessment for adults based on body burdens estimated from PBDE serum levels (supplemental information to Table 3 of main text) - USA**

| Parameter                      | units                             | Statistic | Value | BDE-47         | BDE-99       | BDE-153       | BDE-209        | Sum                 | Reference            |
|--------------------------------|-----------------------------------|-----------|-------|----------------|--------------|---------------|----------------|---------------------|----------------------|
| <b>A</b>                       | Critical body burden <sup>a</sup> | ng/kg bw  |       | <i>232,000</i> | <b>9,000</b> | <b>62,000</b> | <i>425,000</i> |                     | EFSA (2011)          |
| b                              | Serum levels                      | ng/g lw   | mean  | 12.0           | 1.7          | 7.6           | 1.7            |                     | Lunder et al. (2010) |
| c                              |                                   |           | max   | 40.0           | 5.2          | 32.0          | 3.2            |                     |                      |
| d                              | Body fat                          | %         | mean  | 29             |              |               |                |                     |                      |
| <b>E=b*d</b>                   | <b>Body</b>                       | ng/kg     | mean  | 3480           | 493          | 2204          | 493            |                     |                      |
| <b>F=c*d</b>                   | <b>burden</b>                     | bw        | max   | 11600          | 1508         | 9280          | 928            |                     |                      |
| <b>Mixture risk assessment</b> |                                   |           |       |                |              |               |                | <b>Hazard Index</b> |                      |
| x                              | Assessment factor                 |           |       |                |              |               |                |                     |                      |
| <b>E*x/A</b>                   | Hazard                            |           | mean  | 0.038          | 0.137        | 0.089         | 0.003          | <b>0.27</b>         |                      |
| <b>F*x/A</b>                   | quotients                         |           | max   | 0.125          | 0.42         | 0.37          | 0.005          | <b>0.92</b>         |                      |

<sup>a</sup> The PBDE body burden in rodents at a dose equivalent to the BMDL<sub>10</sub>, from EFSA (2011), p 157, Table 40. Values in italics are read-across from the values in bold that were derived from available experimental data; see Level 2 procedure in Material and Methods (Bridging assumption made in the hazard assessment component of MRA), main text.

## References

- Allen JG, McClean MD, Stapleton HM, Webster TF. 2008. Critical factors in assessing exposure to PBDEs via house dust. *Environment international* 34:1085-1091.
- Antignac JP, Cariou R, Zalko D, Berrebi A, Cravedi JP, Maume D, Marchand P, Monteau F, Riu A, Andre F, Le Bizec B. 2009. Exposure assessment of French women and their newborn to brominated flame retardants: Determination of tri- to deca- polybromodiphenylethers (PBDE) in maternal adipose tissue, serum, breast milk and cord serum. *Environmental Pollution* 157:164-173.
- Asante KA, Takahashi S, Itai T, Isobe T, Devanathan G, Muto M, Agyakwah SK, du-Kumi S, Subramanian A, Tanabe S. 2013. Occurrence of halogenated contaminants in inland and coastal fish from Ghana: Levels, dietary exposure assessment and human health implications. *Ecotoxicology and Environmental Safety* 94:123-130.
- Batterman S, Godwin C, Chernyak S, Jia C, Charles S. 2010. Brominated flame retardants in offices in Michigan, USA. *Environment international* 36:548-556.
- Bi X, Thomas GO, Jones KC, Qu W, Sheng G, Martin FL, Fu J. 2007. Exposure of electronics dismantling workers to polybrominated diphenyl ethers, polychlorinated biphenyls, and organochlorine pesticides in South China. *Environmental science & technology* 41:5647-5653.
- Bjorklund J, Sellstrom U, de Wit C, Aune M, Lignell S, Darnerud P. 2012. Comparisons of polybrominated diphenyl ether and hexabromocyclododecane concentrations in dust collected with two sampling methods and matched breast milk samples. *Indoor Air* 22:279-288.
- Chao HR, Tsou TC, Huang HL, Chang-Chien GP. 2011. Levels of Breast Milk PBDEs From Southern Taiwan and Their Potential Impact on Neurodevelopment. *Pediatric Research* 70:596-600.
- Coakley JD, Harrad SJ, Goosey E, Ali N, Dirtu AC, Van den Eede N, Covaci A, Douwes J, Marnettje A'. 2013. Concentrations of polybrominated diphenyl ethers in matched samples of indoor dust and breast milk in New Zealand. *Environment international* 59:255-261.
- Cunha S, Kalachova K, Pulkrabova J, Fernandes J, Oliveira M, Alves A, Hajslova J. 2010. Polybrominated diphenyl ethers (PBDEs) contents in house and car dust of Portugal by pressurized liquid extraction (PLE) and gas chromatography-mass spectrometry (GC-MS). *Chemosphere* 78:1263-1271.
- D'Hollander W, Roosens L, Covaci A, Cornelis C, Reynders H, Van Campenhout K, de Voogt P, Bervoets L. 2010. Brominated flame retardants and perfluorinated compounds in indoor dust from homes and offices in Flanders, Belgium. *Chemosphere* 81:478-487.
- Devanathan G, Subramanian A, Sudaryanto A, Takahashi S, Isobe T, Tanabe S. 2012. Brominated flame retardants and polychlorinated biphenyls in human breast milk from several locations in India: potential contaminant sources in a municipal dumping site. *Environ Int* 39:87-95.
- EFSA. 2011. EFSA Panel on Contaminants in the Food Chain (CONTAM); Scientific Opinion on Polybrominated Diphenyl Ethers (PBDEs) in Food. *EFSA Journal* 2011;9(5):2156.
- Eguchi A, Nomiya K, Devanathan G, Subramanian A, Bulbule KA, Parthasarathy P, Takahashi S, Tanabe S. 2012. Different profiles of anthropogenic and naturally produced organohalogen compounds in serum from residents living near a coastal area and e-waste recycling workers in India. *Environ Int* 47:8-16.
- Gomara B, Herrero L, Ramos J, Mateo J, Fernandez M, Garcia J, Gonzalez M. 2007. Distribution of polybrominated diphenyl ethers in human umbilical cord serum, paternal serum, maternal serum, placentas, and breast milk from Madrid population, Spain. *Environmental science & technology* 41:6961-6968.
- Harrad S, Goosey E, Desborough J, Abdallah MA-E, Roosens L, Covaci A. 2010. Dust from UK Primary School Classrooms and Daycare Centers: The Significance of Dust As a Pathway of Exposure of Young UK Children to Brominated Flame Retardants and Polychlorinated Biphenyls. *Environmental science & technology* 44:4198-4202.
- Hawkes CP, Hourihane JO, Kenny LC, Irvine AD, Kiely M, Murray DM. 2011. Gender- and gestational age-specific body fat percentage at birth. *Pediatrics* 128:e645-e651.

- Hearn LK, Hawker DW, Toms LM, Mueller JF. 2013. Assessing exposure to polybrominated diphenyl ethers (PBDEs) for workers in the vicinity of a large recycling facility. *Ecotoxicology and Environmental Safety* 92:222-228.
- Jakobsson K, Fang J, Athanasiadou M, Rignell-Hydbom A, Bergman A. 2012. Polybrominated diphenyl ethers in maternal serum, umbilical cord serum, colostrum and mature breast milk. Insights from a pilot study and the literature. *Environment international* 47:121-130.
- Johnson PI, Stapleton HM, Slodin A, Meeker JD. 2010. Relationships between Polybrominated Diphenyl Ether Concentrations in House Dust and Serum. *Environmental science & technology* 44:5627-5632.
- Kalachova K, Hradkova P, Lankova D, Hajslova J, Pulkrabova J. 2012. Occurrence of brominated flame retardants in household and car dust from the Czech Republic. *Science of the Total Environment* 441:182-193.
- Kang Y, Wang HS, Cheung KC, Wong MH. 2011. Polybrominated diphenyl ethers (PBDEs) in indoor dust and human hair. *Atmospheric Environment* 45:2386-2393.
- Karlsson M, Julander A, van Bavel B, Hardell L. 2007. Levels of brominated flame retardants in blood in relation to levels in household air and dust. *Environment international* 33:62-69.
- Koh TW, Chen SC-C, Chang-Chien GP, Lin DY, Chen FA, Chao HR. 2010. Breast-milk levels of polybrominated diphenyl ether flame retardants in relation to women's age and pre-pregnant body mass index. *International journal of hygiene and environmental health* 213:59-65.
- Lunder S, Hovander L, Athanassiadis I, Bergman A. 2010. Significantly Higher Polybrominated Diphenyl Ether Levels in Young US Children than in Their Mothers. *Environmental science & technology* 44:5256-5262.
- Ma S, Yu Z, Zhang X, Ren G, Peng P, Sheng G, Fu J. 2012. Levels and congener profiles of polybrominated diphenyl ethers (PBDEs) in breast milk from Shanghai: Implication for exposure route of higher brominated BDEs. *Environment international* 42:72-77.
- Malarvannan G, Isobe T, Covaci A, Prudente M, Tanabe S. 2013. Accumulation of brominated flame retardants and polychlorinated biphenyls in human breast milk and scalp hair from the Philippines: Levels, distribution and profiles. *Science of the Total Environment* 442:366-379.
- Qu W, Bi X, Sheng G, Lu S, Fu H, Yuan J, Li L. 2007. Exposure to polybrominated diphenyl ethers among workers at an electronic waste dismantling region in Guangdong, China. *Environment international* 33:1029-1034.
- Regueiro J, Llompert M, Garcia-Jares C, Cela R. 2007. Factorial-design optimization of gas chromatographic analysis of tetrabrominated to decabrominated diphenyl ethers. Application to domestic dust. *Analytical and Bioanalytical Chemistry* 388:1095-1107.
- Sahlstrom LM, Sellstrom U, De Wit CA, Lignell S, Darnerud PO. 2014. Brominated flame retardants in matched serum samples from Swedish first-time mothers and their toddlers. *Environ Sci Technol* 48:7584-7592.
- Schechter A, Johnson-Welch S, Tung KC, Harris TR, Papke O, Rosen R. 2007. Polybrominated diphenyl ether (PBDE) levels in livers of U.S. human fetuses and newborns. *J Toxicol Environ Health A* 70:1-6.
- Stapleton HM, Dodder NG, Offenbergh JH, Schantz MM, Wise SA. 2005. Polybrominated diphenyl ethers in house dust and clothes dryer lint. *Environmental science & technology* 39:925-931.
- Stasinska A, Reid A, Hinwood A, Stevenson G, Callan A, Odland JO, Heyworth J. 2013. Concentrations of polybrominated diphenyl ethers (PBDEs) in residential Cross Mark dust samples from Western Australia. *Chemosphere* 91:187-193.
- Sudaryanto A, Kajiwara N, Tsydenova OV, Isobe T, Yu H, Takahashi S, Tanabe S. 2008. Levels and congener specific profiles of PBDEs in human breast milk from China: Implication on exposure sources and pathways. *Chemosphere* 73:1661-1668.
- Sun S, Zhao J, Leng J, Wang P, Wang Y, Fukatsu H, Liu D, Liu X, Kayama F. 2010. Levels of dioxins and polybrominated diphenyl ethers in human milk from three regions of northern China and potential dietary risk factors. *Chemosphere* 80:1151-1159.

- Thuresson K, Bjorklund JA, de Wit CA. 2012. Tri-decabrominated diphenyl ethers and hexabromocyclododecane in indoor air and dust from Stockholm microenvironments 1: Levels and profiles. *Science of the Total Environment* 414:713-721.
- Toms LM, Bartkow ME, Symons R, Paepke O, Mueller JF. 2009. Assessment of polybrominated diphenyl ethers (PBDEs) in samples collected from indoor environments in South East Queensland, Australia. *Chemosphere* 76:173-178.
- Trudel D, Scheringer M, von Goetz N, Hungerbuhler K. 2011. Total consumer exposure to polybrominated diphenyl ethers in North America and Europe. *Environmental Science and Technology* 45:2391-2397.
- Uemura H, Arisawa K, Hiyoshi M, Dakeshita S, Kitayama A, Takami H, Sawachika F, Yamaguchi M, Sasai S. 2010. Congener-specific body burden levels and possible determinants of polybrominated diphenyl ethers in the general Japanese population. *Chemosphere* 79:706-712.
- Wang D, Atkinson S, Hoover-Miller A, Shelver WL, Li QX. 2008. Simultaneous use of gas chromatography/ion trap mass spectrometry - electron capture detection to improve the analysis of bromodiphenyl ethers in biological and environmental samples. *Rapid Communications in Mass Spectrometry* 22:647-656.
- Watkins DJ, McClean MD, Fraser AJ, Weinberg J, Stapleton HM, Webster TF. 2013. Associations between PBDEs in office air, dust, and surface wipes. *Environment international* 59:124-132.
- Wei H, Turyk M, Cali S, Dorevitch S, Erdal S, Li A. 2009. Particle size fractionation and human exposure of polybrominated diphenyl ethers in indoor dust from Chicago. *Journal of Environmental Science and Health Part A-Toxic/Hazardous Substances & Environmental Engineering* 44:1353-1361.
- Wu XM, Bennett DH, Moran RE, Sjodin A, Jones RS, Tancredi DJ, Tulse NS, Clifton MS, Colon M, Weathers W, Hertz-Picciotto I. 2015. Polybrominated diphenyl ether serum concentrations in a Californian population of children, their parents, and older adults: an exposure assessment study. *Environ Health* 14:23.
- Zhang X, Ruan X, Yan M, Zhao Y, Wei W, Qin Z, Yang Y, Xu H, Li Y. 2011. Polybrominated diphenyl ether (PBDE) in blood from children (age 9-12) in Taizhou, China. *Journal of Environmental Sciences-China* 23:1199-1204.
- Zhao Y, Ruan X, Li Y, Yan M, Qin Z. 2013. Polybrominated Diphenyl Ethers (PBDEs) in Aborted Human Fetuses and Placental Transfer during the First Trimester of Pregnancy. *Environmental science & technology* 47:5939-5946.
- Zheng J, Luo XJ, Yuan JG, Wang J, Wang YT, Chen SJ, Mai BX, Yang ZY. 2011. Levels and sources of brominated flame retardants in human hair from urban, e-waste, and rural areas in South China. *Environmental Pollution* 159:3706-3713.
- Zhu L, Ma B, Hites RA. 2009. Brominated Flame Retardants in Serum from the General Population in Northern China. *Environmental science & technology* 43:6963-6968.
